# Supplementary material for: Supramolecular AIE polymer-based rare earth metallogels for the selective detection and high efficiency removal of cyanide and perchlorate
Source: Royal Society of Chemistry journal article supplement (doi:10.1039/d0py01630f), 2021-01-01
Supplement: d0py01630f1.pdf [file d0py01630f1.pdf]

## *Supporting Information*

# **Supramolecular AIE Polymer-based Rare Earth Metallogels for Selective Detection and High Efficiency Removal of Cyanide and Perchlorate**

Qi Zhang<sup>a</sup>, You-Ming Zhang<sup>\*a, b</sup>, Hong Yao<sup>a</sup>, Tai-Bao Wei<sup>a</sup>, Bingbing Shi<sup>a</sup> and Qi Lin<sup>\*a</sup>

*<sup>a</sup> Key Laboratory of Eco-functional Polymer Materials of the Ministry of Education; Key Laboratory of Eco-environmental Polymer Materials of Gansu Province, College of Chemistry and Chemical Engineering, Northwest Normal University, Lanzhou, Gansu, 730070, China.*

*<sup>b</sup> Gansu Natural Energy Research Institute, Lanzhou, Gansu 730046, China.*

*\* Corresponding author.*

*E-mail addresses: zhangnwnu@126.com (Y.-M. Zhang), linqi2004@126.com (Q. Lin).*

## Contents

|                                          |        |
|------------------------------------------|--------|
| 1. Experimental section .....            | - 1 -  |
| 1.1 Chemicals and materials .....        | - 1 -  |
| 1.2 General Experimental Procedures..... | - 1 -  |
| 2. Supplementary figures .....           | - 3 -  |
| 3. Supplementary table .....             | - 26 - |
| 4.References .....                       | - 28 - |

## 1. Experimental section

### 1.1 Chemicals and materials

All solvents and reagents were commercially available in an analytical degree and used without further purification. All cations and anions were prepared in an aqueous solution ( $c = 0.1 \text{ m}$ ).  $^1\text{H}$  NMR spectra were recorded at 600MHz and 400MHz,  $^{13}\text{C}$  NMR spectra at 151MHz. Ultraviolet-visible (UV-vis) spectra were recorded on a Shimadzu UV-2550 spectrometer. Fluorescence emission spectra have been obtained using an RF-5301 / PC Optical spectro fluorophotometer (Shimadzu). Scanning Electron Micrographs (SEM) of xerogels were investigated using the JSM-6701F instrument with an acceleration voltage of 8 kV. The IR spectra were performed on a Digilab FTS-3000 Fourier transform-infrared spectrophotometer. A Rheological Properties Test was performed using a Rheolaser Lab Diffusing Wave Spectroscopy instrument (Rheolaser LAB 6 master, Formulaction, France). Dionex ICS-1500 ion chromatograph (Dionex, USA); DS6 conductivity detector; AERS 4mm anion suppressor; Chromeleon 6.8 chromatography workstation; IonPac AS22 anion analysis column (250 mm  $\times$  4 mm); IonPac AG22 anion protection column ( 50 mm  $\times$ 4 mm).

### 1.2 General Experimental Procedures

**$^1\text{H}$  NMR Titration.** **PM** (10 mg,  $9.79 \times 10^{-6} \text{ mol}$ ) was dissolved in  $\text{DMSO-}d_6$  (0.5 mL). Then, a series of different equivalents of **TH** (0.5, 1.0, 1.5, equiv and so on) were added into the solution of **PM**, and their  $^1\text{H}$  NMRs were recorded.

**Fluorescence titration. (1). Fluorescence titration based on different concentrations cations:** A series of the **PT-G** gels with different concentrations (0.1 equiv., 0.2 equiv., 0.3 equiv., 0.4 equiv., and so on) metal ions ( $\text{Eu}^{3+}$  and  $\text{Tb}^{3+}$ ) were prepared by dissolving **PM** (5 mg), **TH** (5 mg) and proper equivalent of metal salt in  $\text{DMSO:H}_2\text{O}$  (2:1/v:v) binary solution (0.3 mL). Then record their fluorescence intensity at 470 nm wavelength.

**(2). Fluorescence titration based on different equivalent anions:** The rare earth metallogels (**PT-GEu** and **PT-GTb**) with different equivalents (0.5 equiv., 1.0equiv., 1.5 equiv., 2.0 equiv., 2.5 equiv. and so on) of anions ( $\text{ClO}_4^-$  or  $\text{CN}^-$ ) were prepared by dissolve **PT-GEu** or **PT-GTb** and proper equivalent of anions salt in DMSO:H<sub>2</sub>O (2:1/v:v) binary solution (0.35 mL). Then record their fluorescence intensity at the 470 nm wavelength.

## 2. Supplementary figures

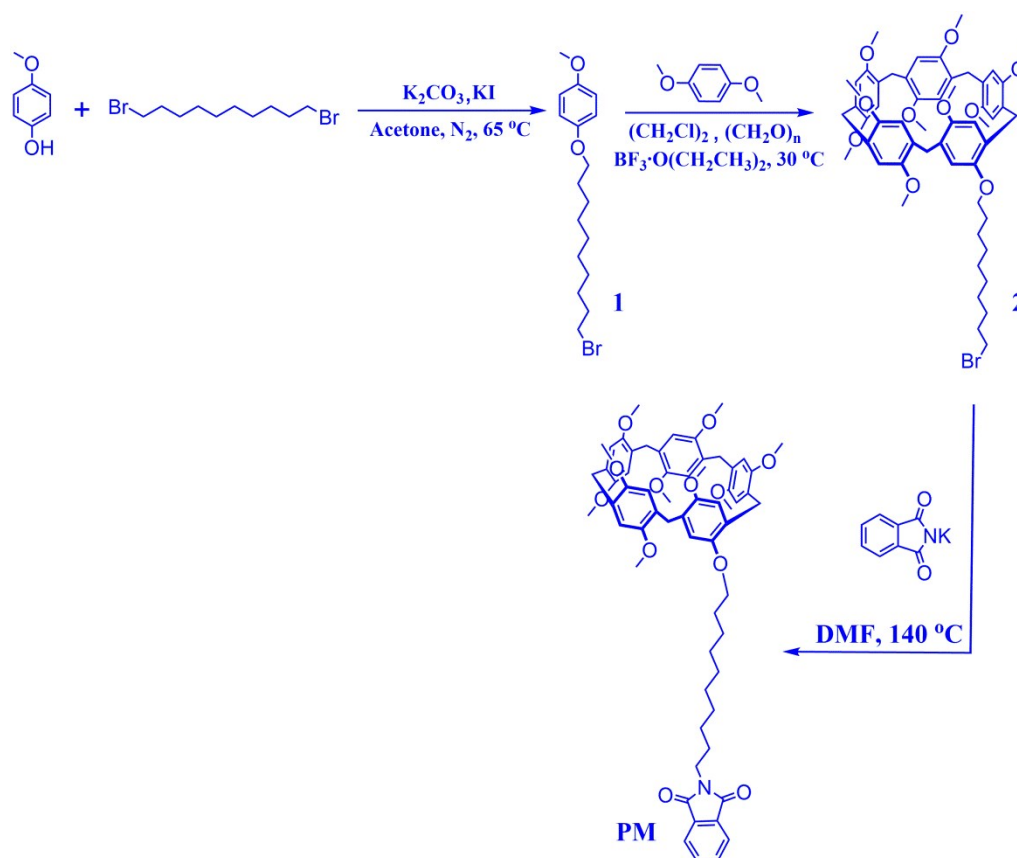

**Scheme S1.** Synthetic routes to compound **PM**.

**Synthesis of the PM** <sup>[1]</sup>. A mixture of pillar[5]arene (compound **2**) (1.1472g, 1.2 mmol) and *o*-phthalimide (0.46305g, 2.5 mmol) in DMF solution (35 mL) was stirred at  $90\text{ }^\circ\text{C}$  for 24 h under nitrogen atmosphere. The solution was evaporated under vacuum and the residue was purified by flash column chromatography (petroleum ether/ethyl acetate = 40/1, v/v) to afford **PM** as a yellow solid (0.996 g, 81.32%), mp:  $60\text{-}62\text{ }^\circ\text{C}$ .  $^1\text{H}$  NMR (DMSO- $d_6$ ), 400 MHz),  $\delta$ /ppm: 7.847-7.842 (m, 1H), 7.838- 7.833 (m, 1H), 7.712-7.707 (m, 1H), 7.703-7.698 (m, 1H), 6.796-6.763 (m, 10H), 3.843-3.821 (t,  $J = 6.5\text{ Hz}$ , 2H), 3.775-3.745 (m, 10H), 3.683- 3.650 (m, 27H), 3.646-3.643(t,  $J = 6.1\text{ Hz}$ , 2H), 1.773-1.657 (m, 4H), 1.488-1.320 (m, 2H), 1.307-1.228 (m, 10H).  $^{13}\text{C}$  NMR (DMSO- $d_6$ , 151 MHz),  $\delta$ /ppm: 168.395, 150.643, 150.605, 133.818, 132.078, 128.258, 123.071, 114.820, 113.942, 68.463, 55.693, 53.191, 40.283, 40.141, 40.000, 39.723, 37.988, 29.692, 29.402, 29.061,

26.781, 26.213. MS m/z: [PM]<sup>+</sup> calcd for C<sub>62</sub>H<sub>71</sub>NO<sub>12</sub>: 1021.4976; found: 1021.4968.

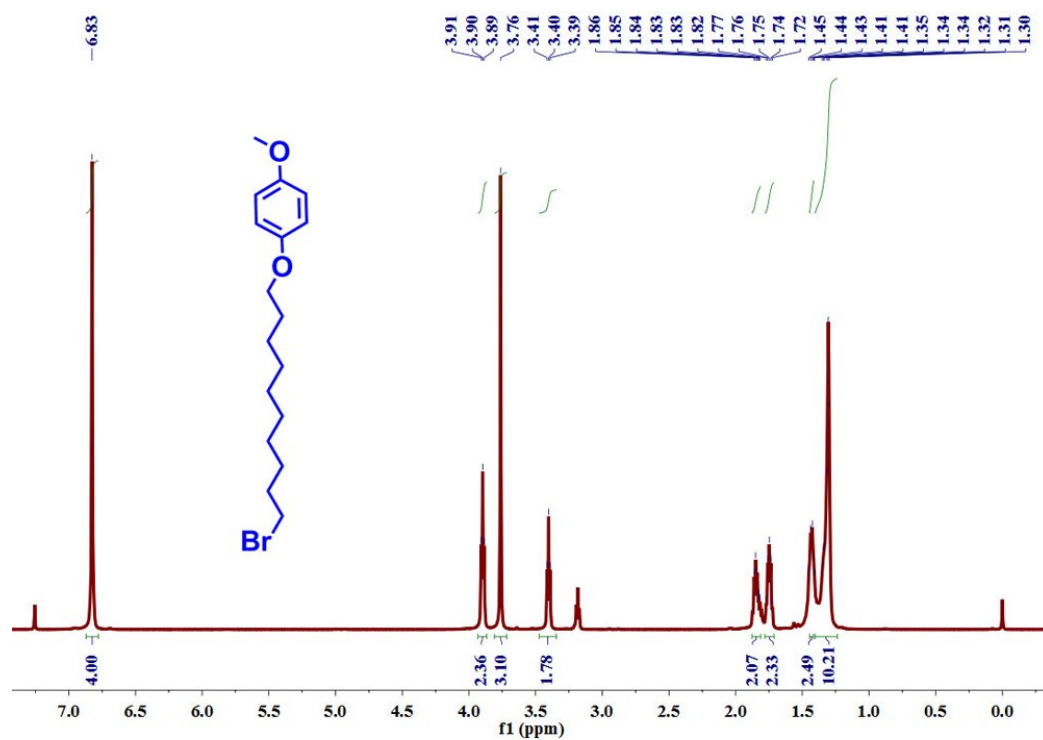

Figure S1. <sup>1</sup>H-NMR spectrum (600 MHz, CDCl<sub>3</sub>) of compound 1.

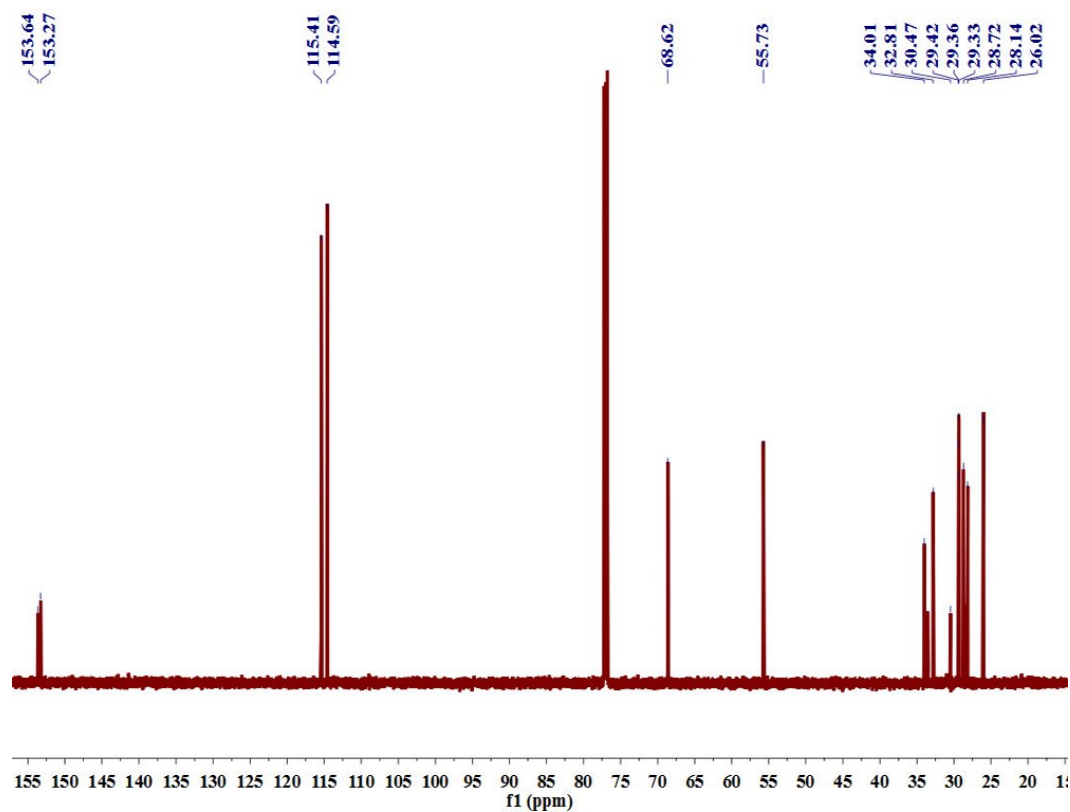

Figure S2. <sup>13</sup>C-NMR spectrum (151 MHz, CDCl<sub>3</sub>) of compound 1.

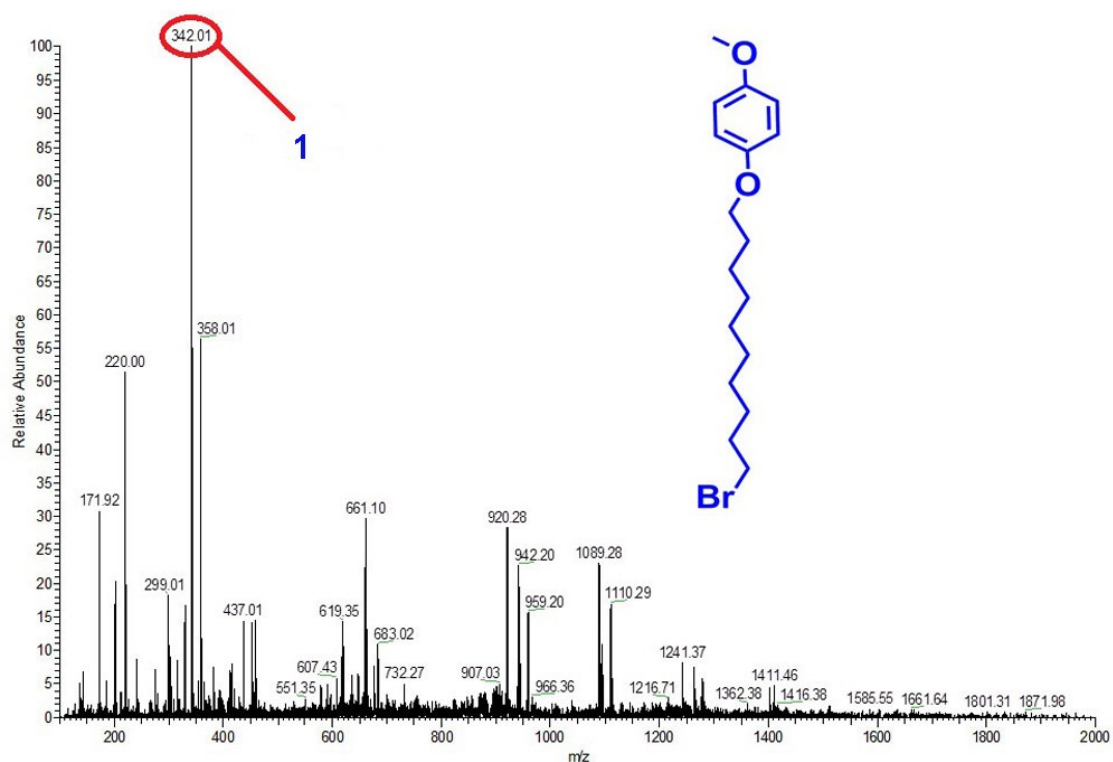

Figure S3. High resolution ESI-MS data of compound 1.

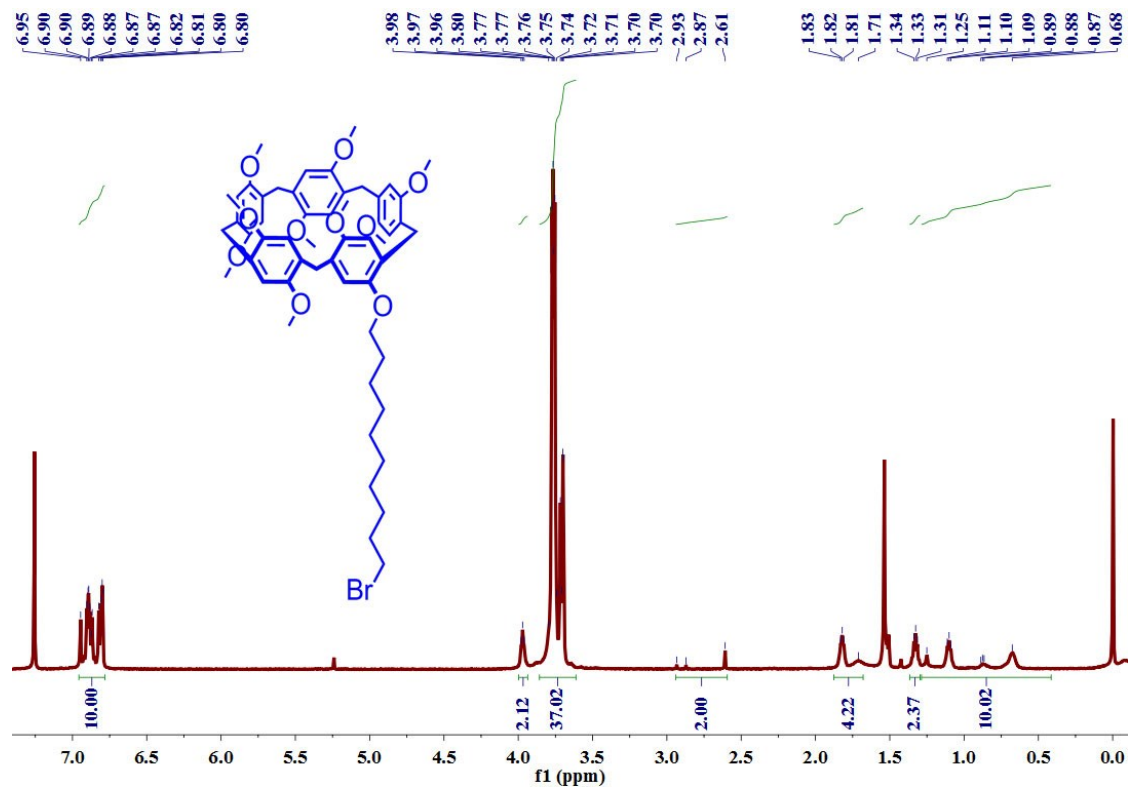

Figure S4. <sup>1</sup>H-NMR spectrum (600 MHz, CDCl<sub>3</sub>) of compound 2.

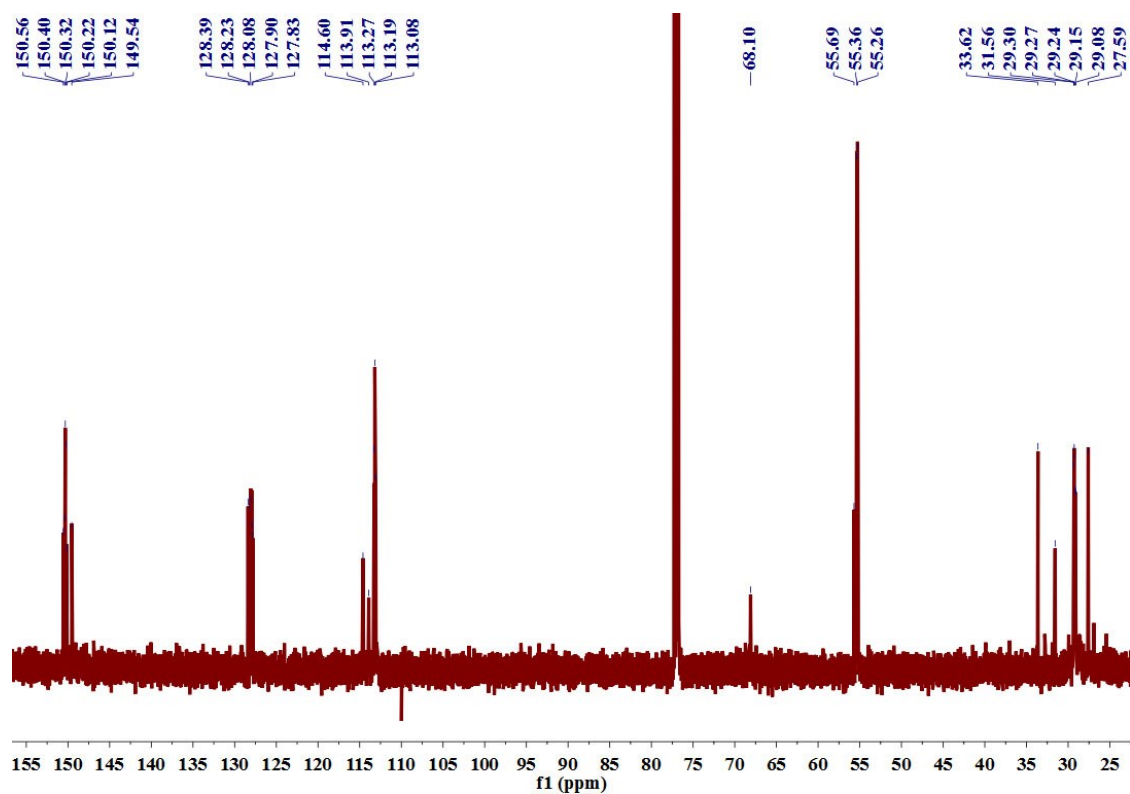

**Figure S5.**  $^{13}\text{C}$ -NMR spectrum (151 MHz,  $\text{CDCl}_3$ ) of compound **2**.

F:\Users\zhuwei\_2\_170314110017

3/14/2017 11:06:07 AM

zhuwei-2\_170314110017 #20 RT: 0.15 AV: 1 NL: 818E5  
T: FTMS+pESI Full ms(200.00-2000.00)

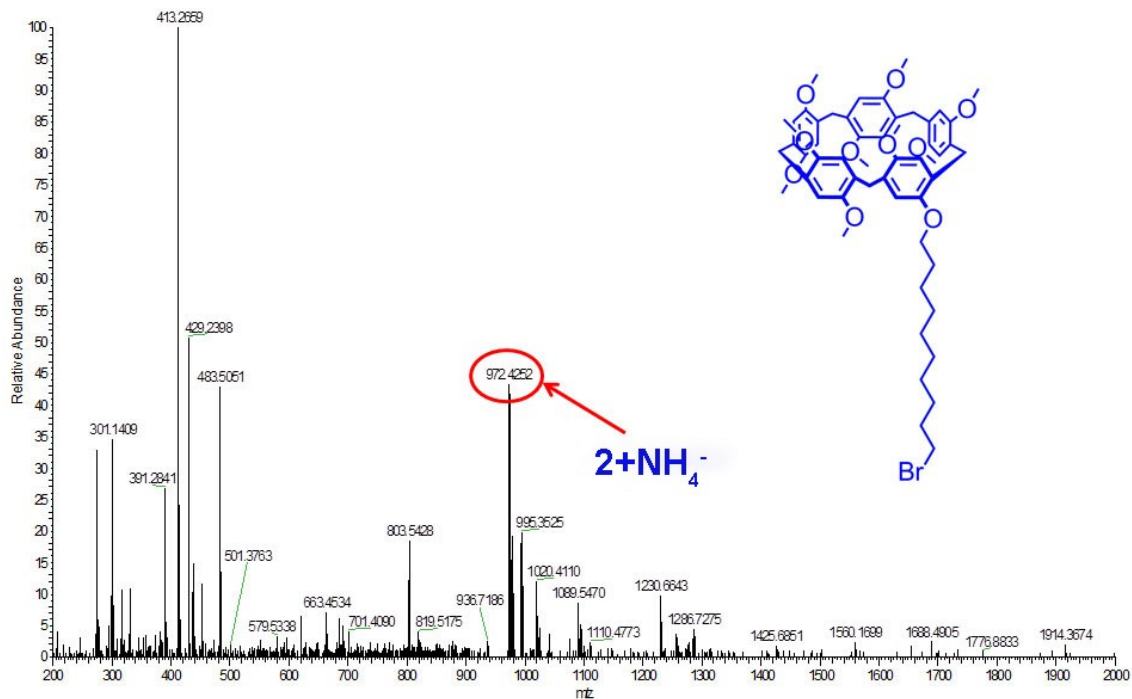

**Figure S6.** High resolution ESI-MS data of compound **2**.



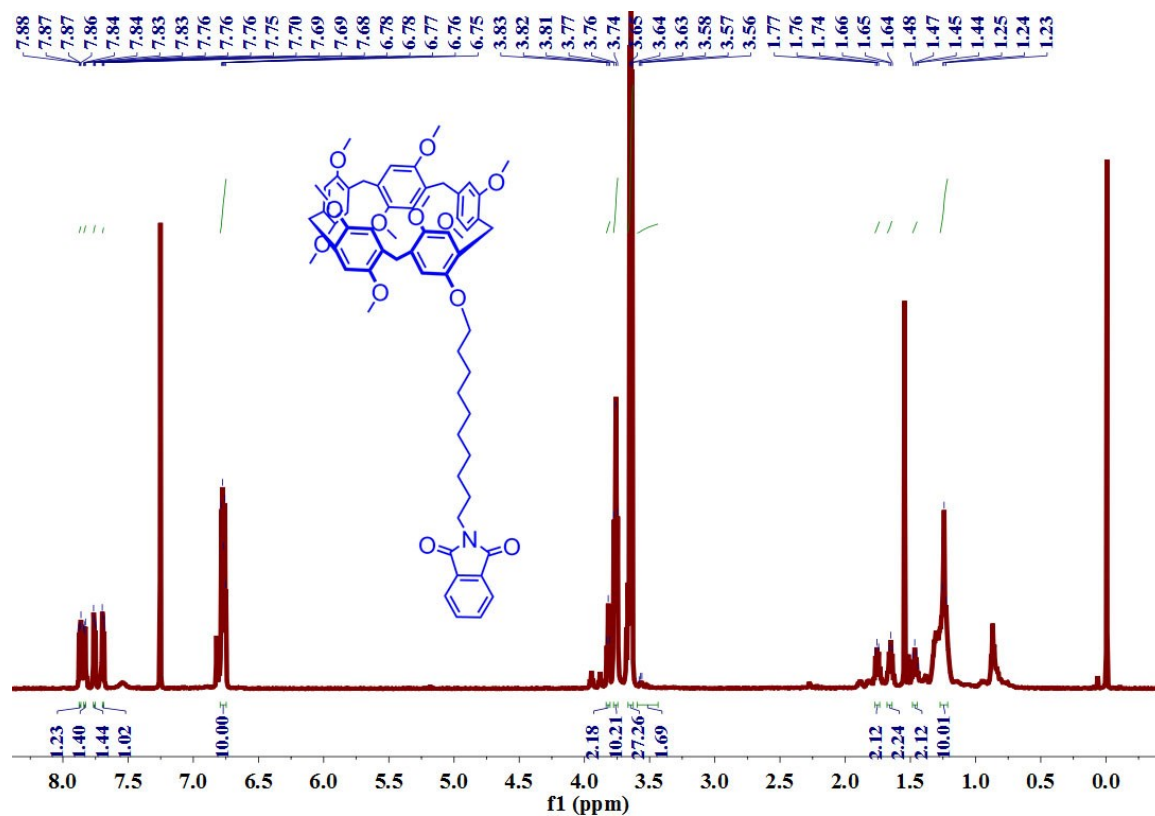

**Figure S7.**  $^1\text{H-NMR}$  spectrum (600 MHz,  $\text{DMSO-}d_6$ ) of compound **PM**.

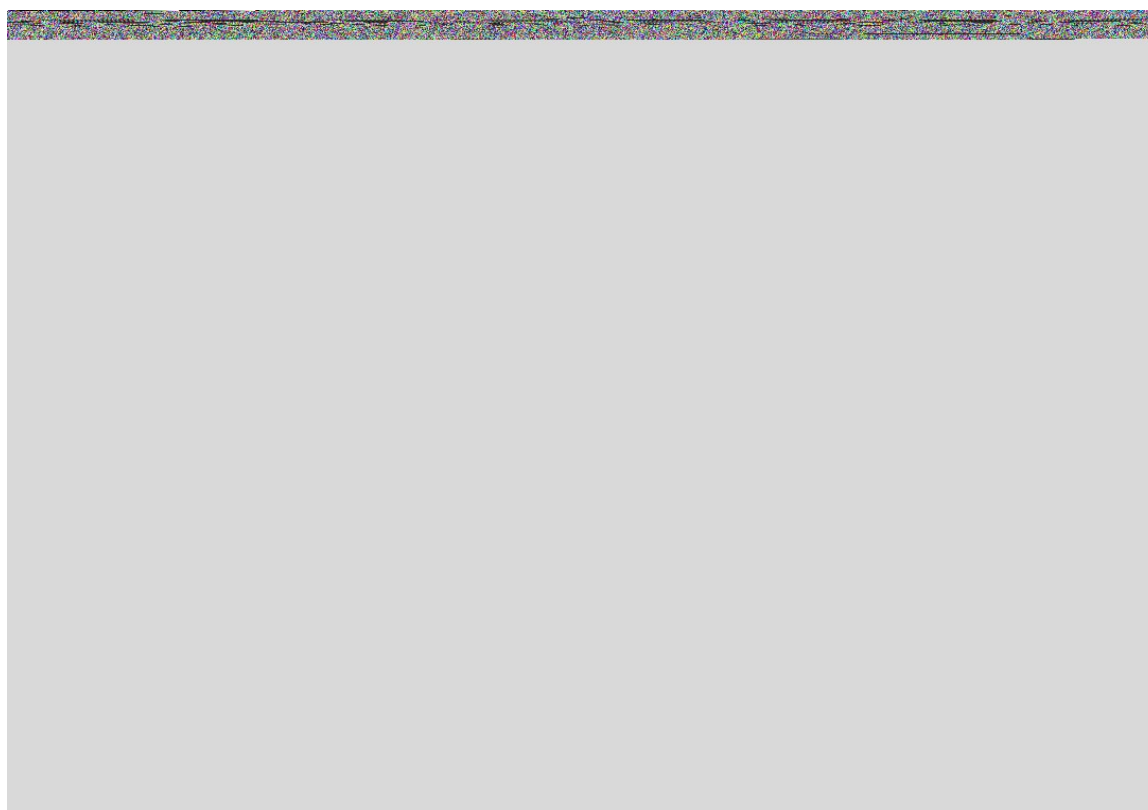

**Figure S8.**  $^{13}\text{C-NMR}$  spectrum (151 MHz,  $\text{DMSO-}d_6$ ) of compound **PM**.

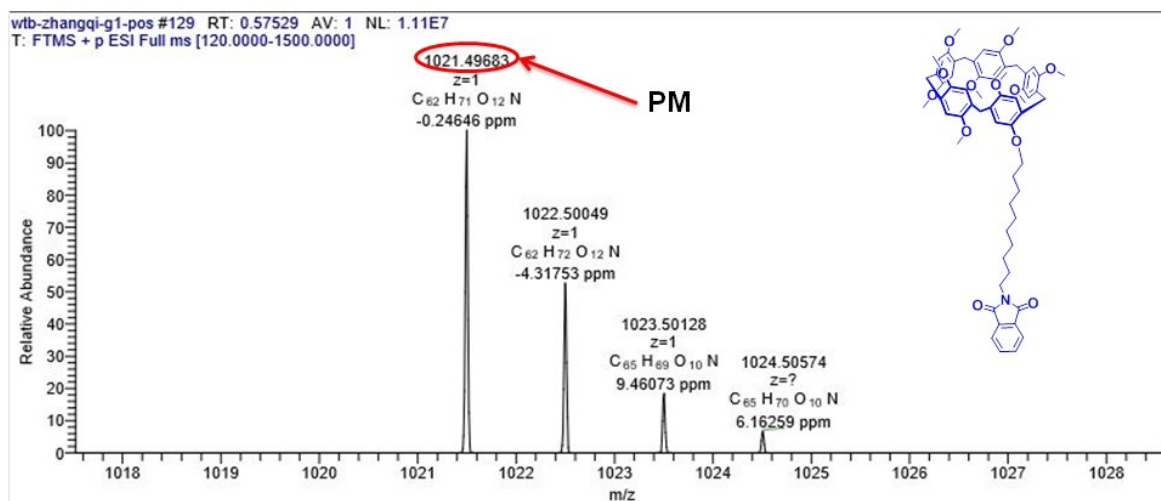

**Figure S9.** High resolution ESI-MS data of compound **PM**.

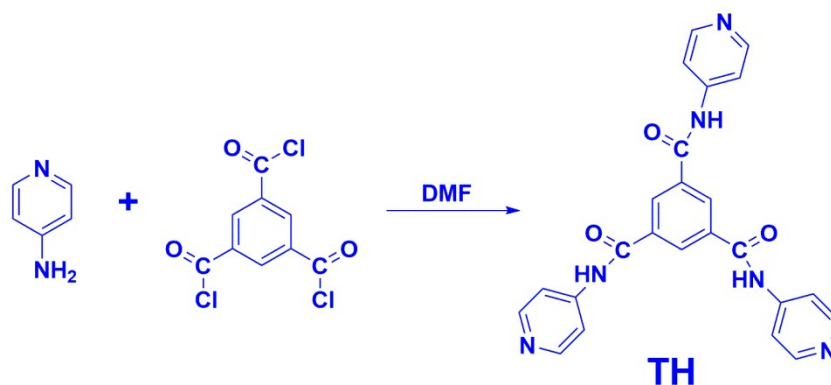

**Scheme S2.** Synthetic routes to compound **TH**.

**Synthesis of the TH** <sup>[2]</sup>. First, we put 1,3,5-benzenetricarbonyl trichloride (0.7965 g, 3.0 mmol) dissolution with DMF (20 mL), and then the solution was dropwise added to a mixture of 4-aminopyridine (1.1295 g, 11 mmol) and TEA (2 mL) in DMF (30 mL). The reaction mixture was stirred at room temperature for 24 h. Recrystallization of **TH** after the reaction was finished, then dried under vacuum. Yield: 0.7186 g (54.67%). M.p.: 270~272 °C. <sup>1</sup>H NMR (400 MHz, DMSO-*d*<sub>6</sub>), δ/ppm: 10.980 (s, 3H), 8.792-8.745 (t, *J* = 8.6 Hz, 3H), 8.457-8.519 (t, *J* = 5.4 Hz, 6H), 7.845-7.834 (t, *J* = 4.4 Hz, 6H). <sup>13</sup>C NMR (151 MHz, DMSO-*d*<sub>6</sub>), δ/ppm: 166.05, 165.66, 150.87, 150.78, 146.26, 146.13, 145.41, 135.38, 134.92, 132.15, 131.03, 114.60, 109.24. MS m/z: [**TA** + H]<sup>+</sup> calcd for C<sub>24</sub>H<sub>19</sub>N<sub>6</sub>O<sub>3</sub>,

439.1519; found 439.1510.

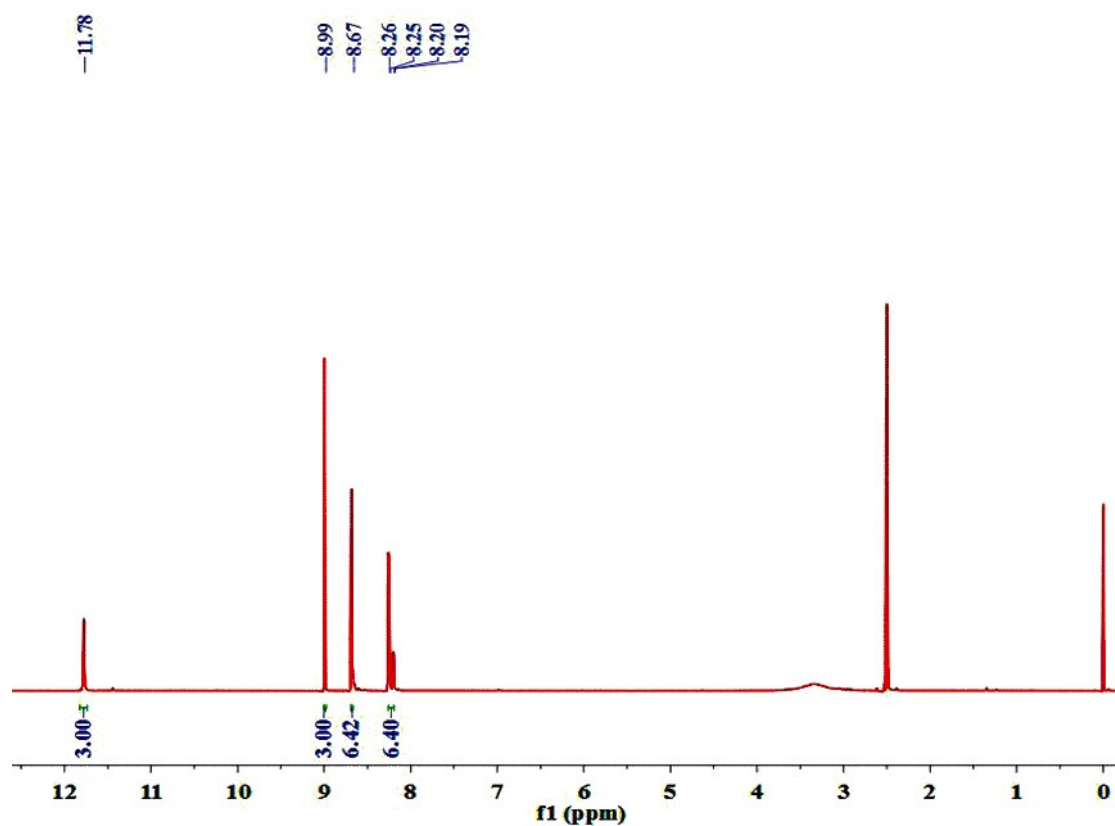

Figure S10.  $^1\text{H-NMR}$  spectrum (600 MHz,  $\text{DMSO-}d_6$ ) of compound TH.

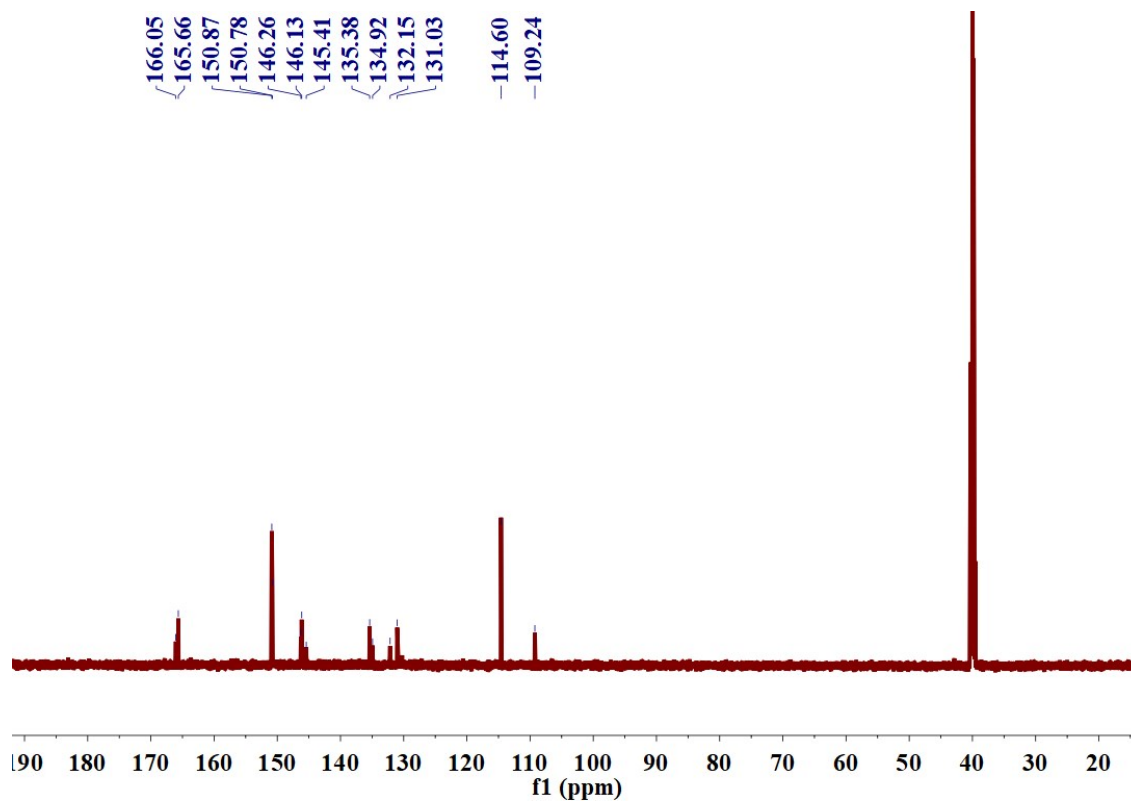

**Figure S11.**  $^{13}\text{C}$ -NMR spectrum (151 MHz,  $\text{DMSO-}d_6$ ) of compound **TH**.

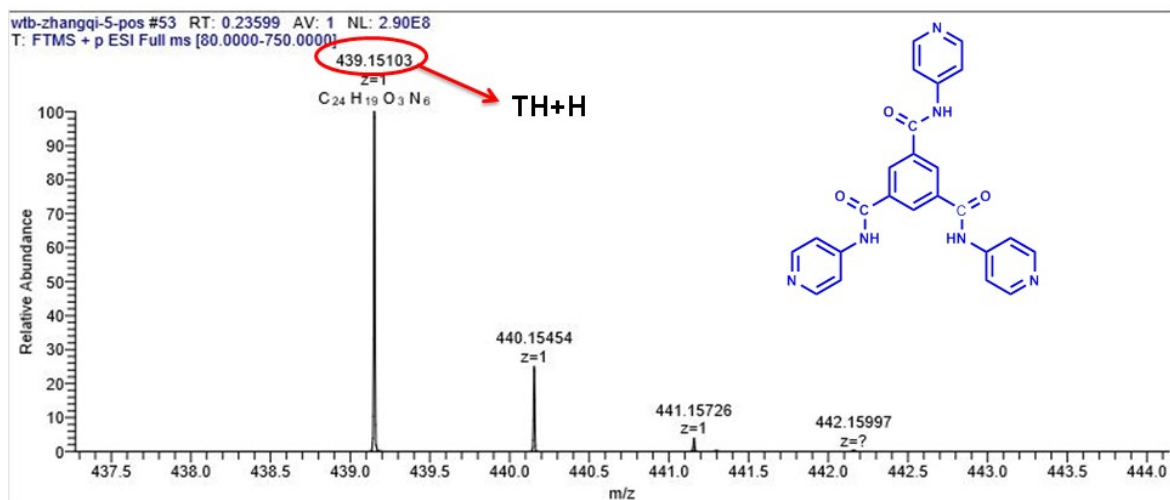

**Figure S12.** High resolution ESI-MS data of compound **TH**.

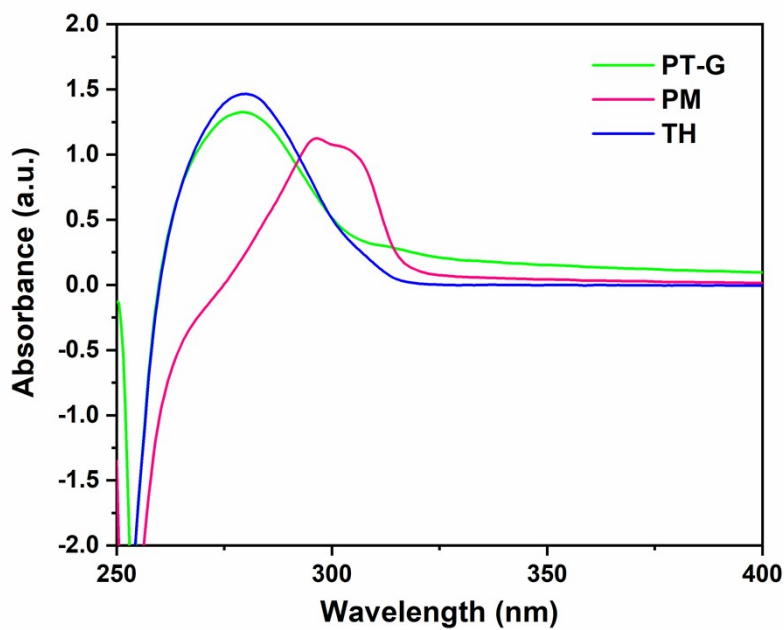

**Figure S13.** The UV-vis spectrum of the **PM**, **TH** and **PT-G** ( $2.0 \times 10^{-5}\text{M}$ ).

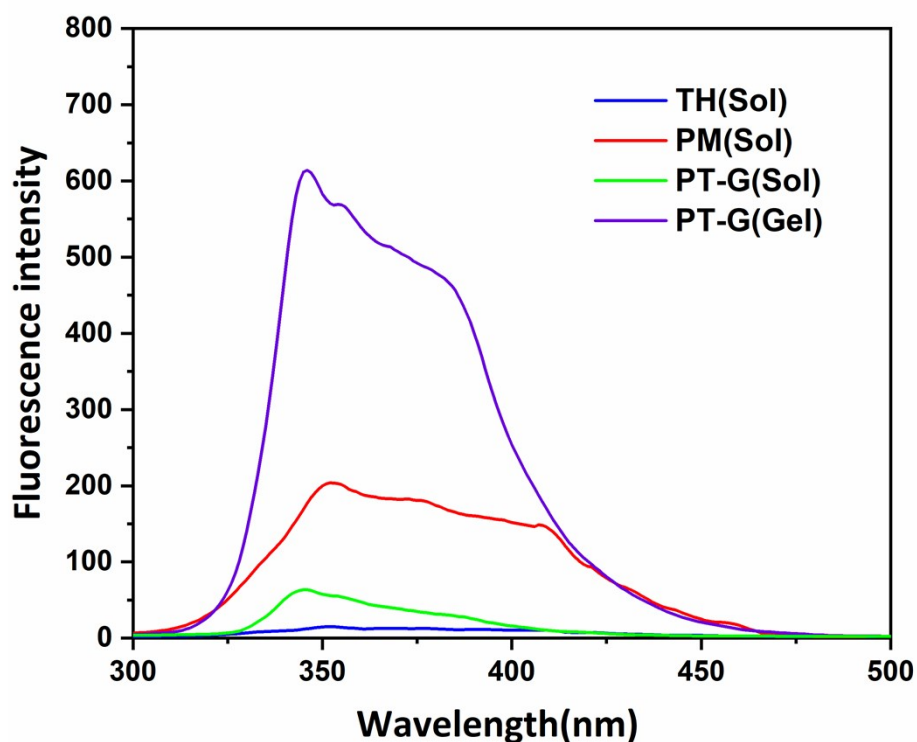

**Figure S14.** Fluorescence spectra of the DMSO-H<sub>2</sub>O (2:1, v/v) binary solution of **PM** ( $c = 19$  mM), **TH** ( $c = 19$  mM), **PT-G** ( $c = 19$  mM,  $T = 60^\circ\text{C} > T_{\text{gel}}$ ) and the **PT-G** gel (in the DMSO/H<sub>2</sub>O (2:1, v/v) binary solution,  $c = 19$  mM,  $T = 25^\circ\text{C} < T_{\text{gel}}$ ).

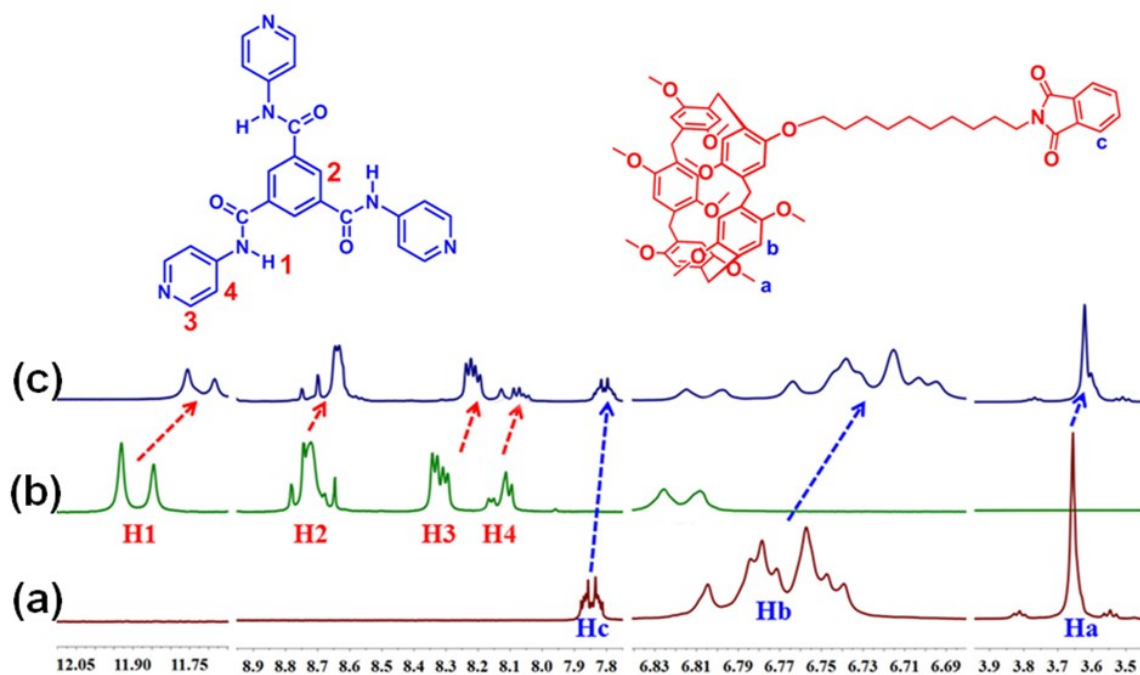

**Figure S15.** Partial host-guest <sup>1</sup>H NMR spectra of (a) free **PM**, (b) free **TH**, (c) **PM** < **TH** 3.0 equiv. in (DMSO-*d*<sub>6</sub>).

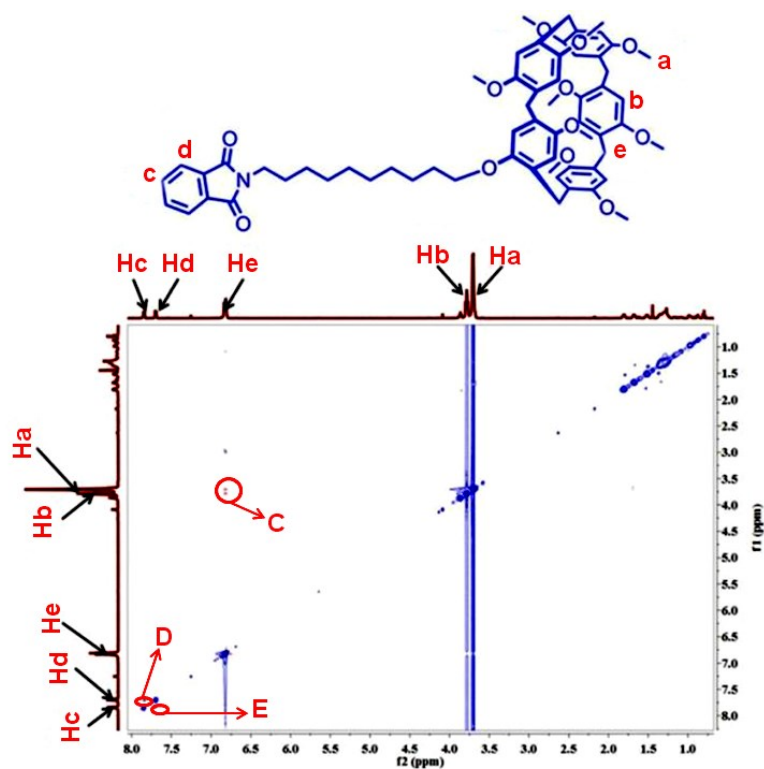

Figure S16. 2D-NOESY NMR spectrum of PM (10 mM) in CDCl<sub>3</sub> solution.

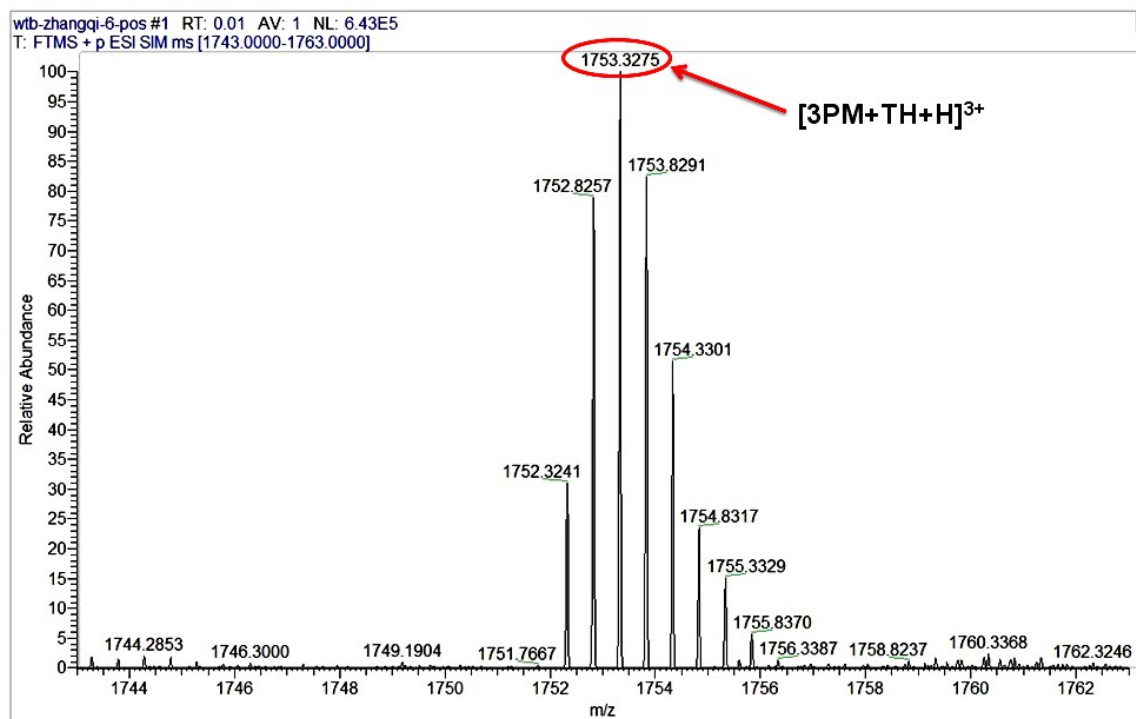

Figure S17. High resolution ESI-MS data of compound PT-G.

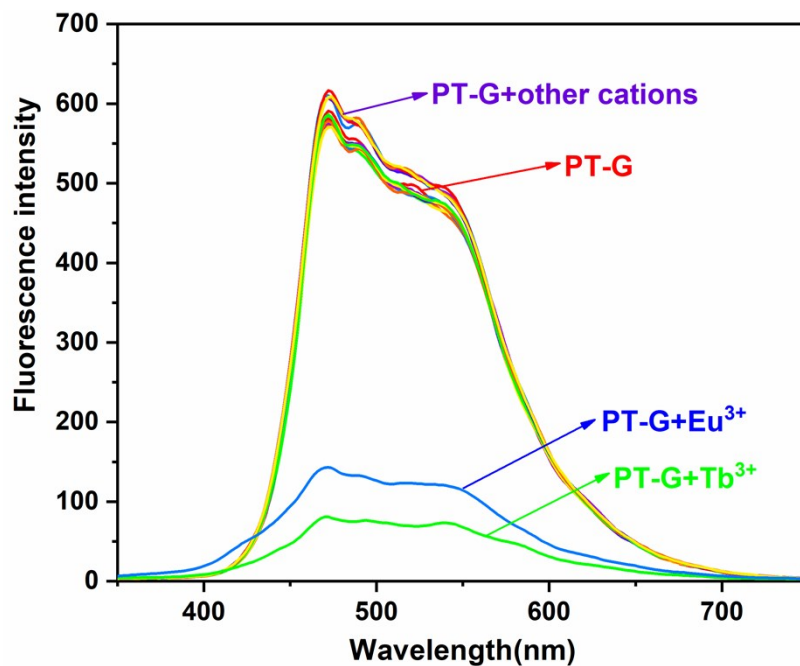

**Figure S18.** Fluorescence spectrum responses of the supramolecular gel **PT-G** (DMSO- $\text{H}_2\text{O}$  (2: 1, v/v)) upon adding of various metal ions ( $\text{Hg}^{2+}$ ,  $\text{Ag}^+$ ,  $\text{Ca}^{2+}$ ,  $\text{Cu}^{2+}$ ,  $\text{Co}^{2+}$ ,  $\text{Ni}^{2+}$ ,  $\text{Cd}^{2+}$ ,  $\text{Pb}^{2+}$ ,  $\text{Zn}^{2+}$ ,  $\text{Cr}^{3+}$ ,  $\text{Mg}^{2+}$ ,  $\text{Ba}^{2+}$ ,  $\text{Al}^{3+}$ ,  $\text{Th}^{4+}$ ,  $\text{Ce}^{3+}$ ,  $\text{La}^{3+}$ ,  $\text{Eu}^{3+}$  and  $\text{Tb}^{3+}$ ,  $c = 0.1 \text{ M}$ , in room temperature).

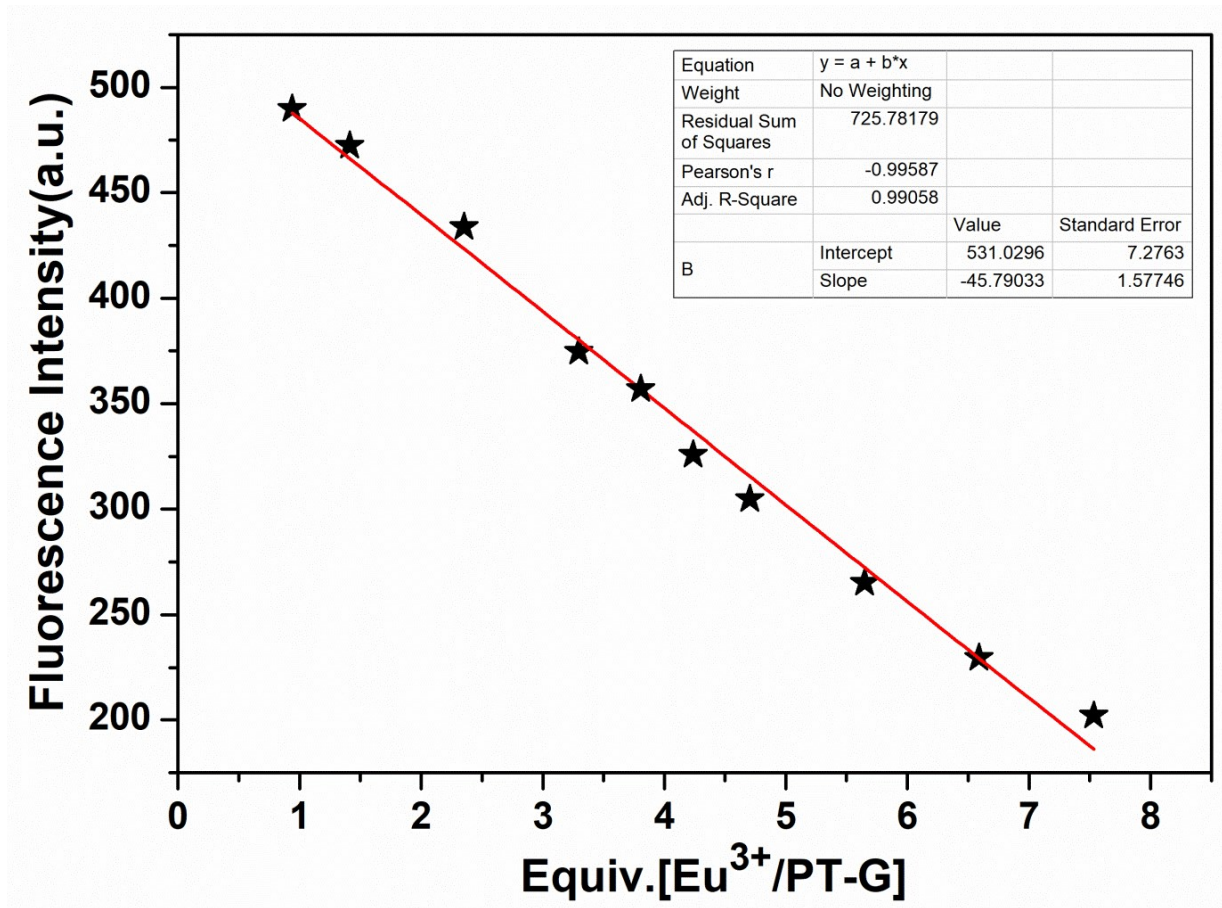

**Figure S19.** Photograph of the linear range for  $\text{Eu}^{3+}$ .

The result of the analysis as follows:

Linear Equation:  $Y = -45.79 \times X + 531.02$        $R^2 = 0.99$

$S = 4.58 \times 10^7$

$$\delta = \sqrt{\frac{\sum_{i=1}^N (F_i - \bar{F})^2}{N - 1}} = 1.58 \quad (N=20)$$

$\text{LOD} = K \times \delta / S = 1.04 \times 10^{-7} \text{ M} \quad (K=3)$



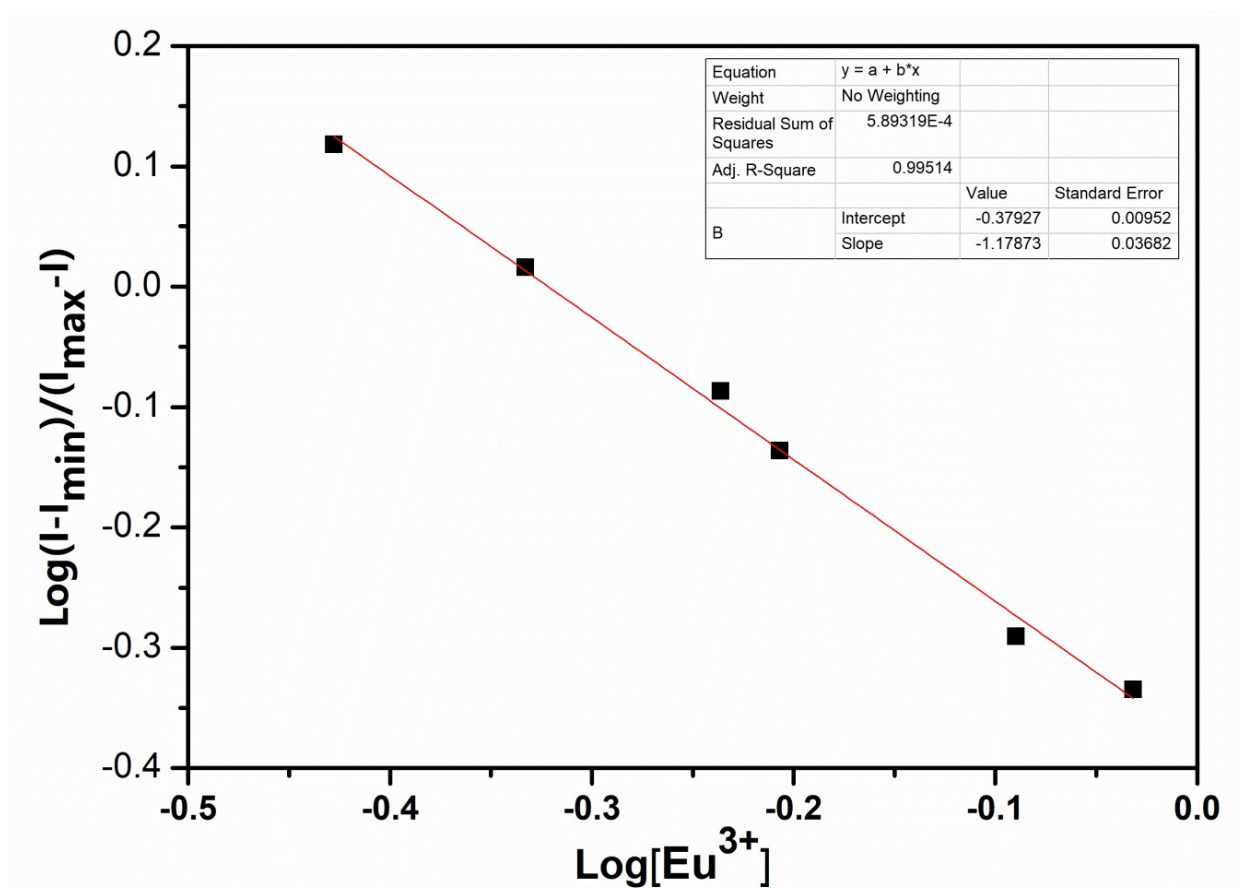

**Figure S20.** The association constant and complex ratio of PT-G and  $\text{Eu}^{3+}$  with

$$\log \frac{I - I_{\min}}{I_{\max} - I} = \log K_a + n \log [G]$$

fluorescent titration. Calculation formula:

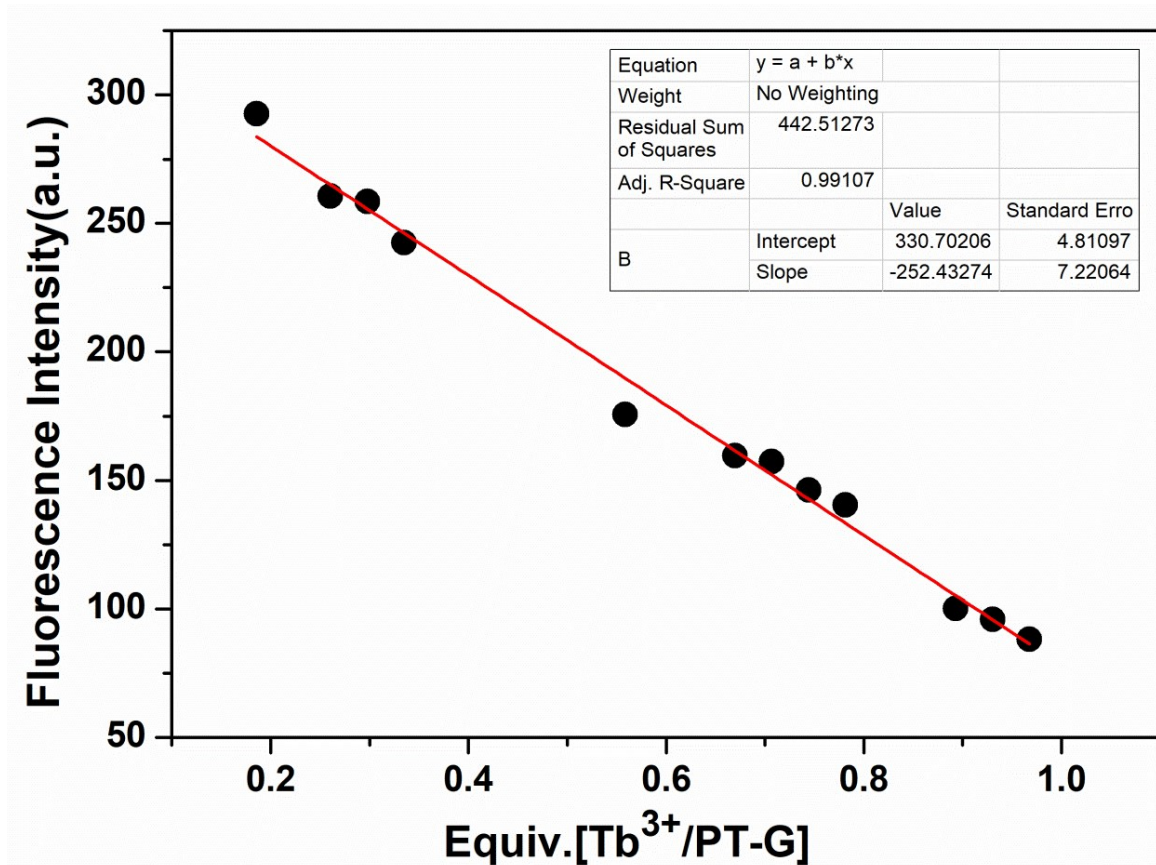

**Figure S21.** Photograph of the linear range for  $Tb^{3+}$ .

The result of the analysis as follows:

Linear Equation:  $Y = -252.43 \times X + 330.70$        $R^2 = 0.99$

$S = 2.52 \times 10^8$

$$\delta = \sqrt{\frac{\sum_{i=1}^N (F_i - \bar{F})^2}{N - 1}} = 1.77 \quad (N=20)$$

$LOD = K \times \delta / S = 2.10 \times 10^{-8} \text{ M} \quad (K=3)$

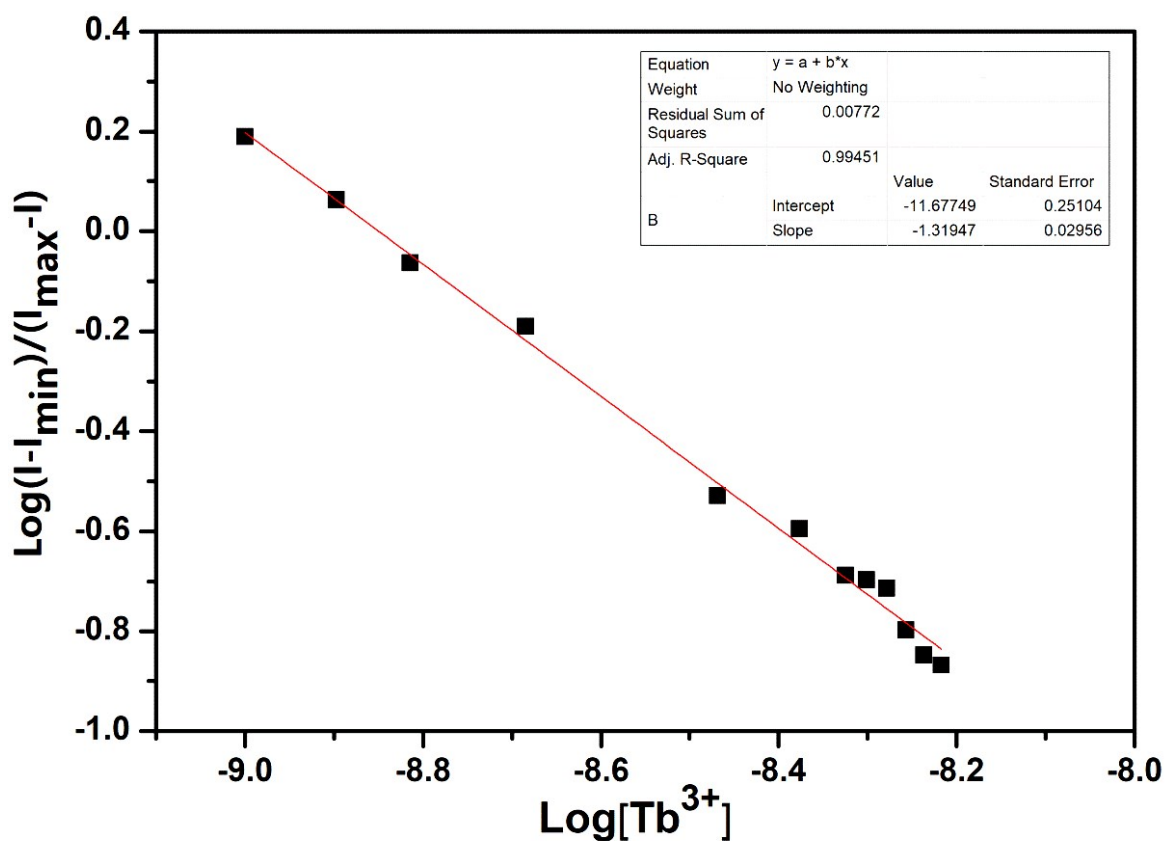

Figure S22. The association constant and complex ratio of PT-G and  $Tb^{3+}$  with

$$\log \frac{I - I_{\min}}{I_{\max} - I} = \log K_a + n \log [G]$$

fluorescent titration. Calculation formula:

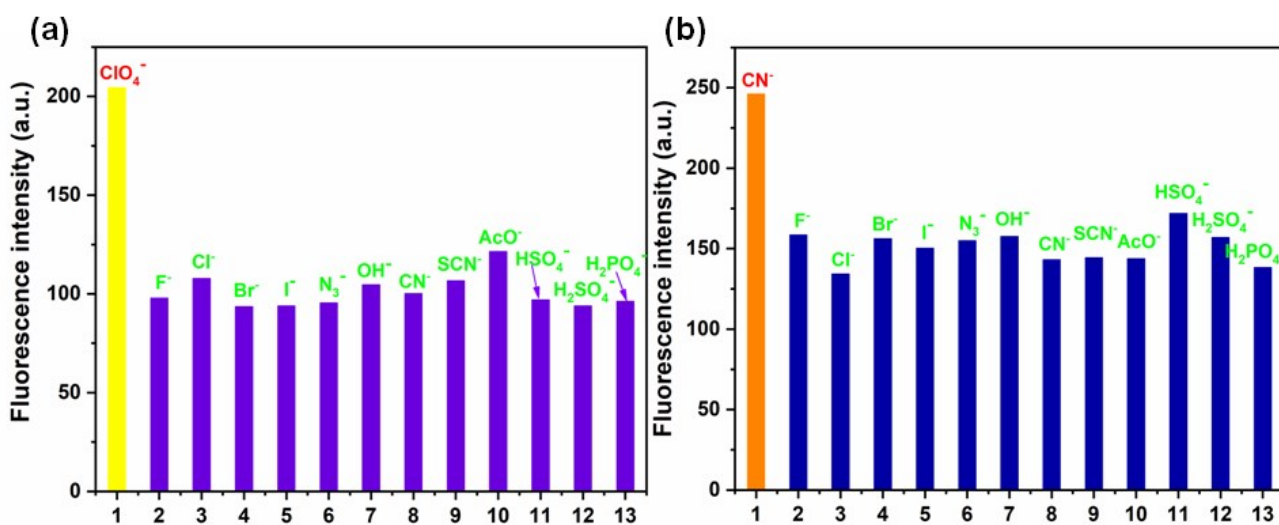

Figure S23. (a) Fluorescence spectrum responses of the PT-GEu (DMSO- $H_2O$  (2: 1, v/v)) upon adding of various anions ( $ClO_4^-$ ,  $F^-$ ,  $Cl^-$ ,  $Br^-$ ,  $I^-$ ,  $N_3^-$ ,  $OH^-$ ,  $CN^-$ ,  $SCN^-$ ,  $AcO^-$ ,  $HSO_4^-$ ,

H<sub>2</sub>SO<sub>4</sub><sup>-</sup> and H<sub>2</sub>PO<sub>4</sub><sup>-</sup>, c = 0.1 M, in room temperature); (b) Fluorescence spectrum responses of the **PT-GTb** (DMSO-H<sub>2</sub>O (2: 1, v/v)) upon adding of various anions (CN<sup>-</sup>, F<sup>-</sup>, Cl<sup>-</sup>, Br<sup>-</sup>, I<sup>-</sup>, N<sub>3</sub><sup>-</sup>, OH<sup>-</sup>, SCN<sup>-</sup>, AcO<sup>-</sup>, HSO<sub>4</sub><sup>-</sup>, H<sub>2</sub>SO<sub>4</sub><sup>-</sup>, ClO<sub>4</sub><sup>-</sup> and H<sub>2</sub>PO<sub>4</sub><sup>-</sup>, c = 0.1 M, in room temperature).

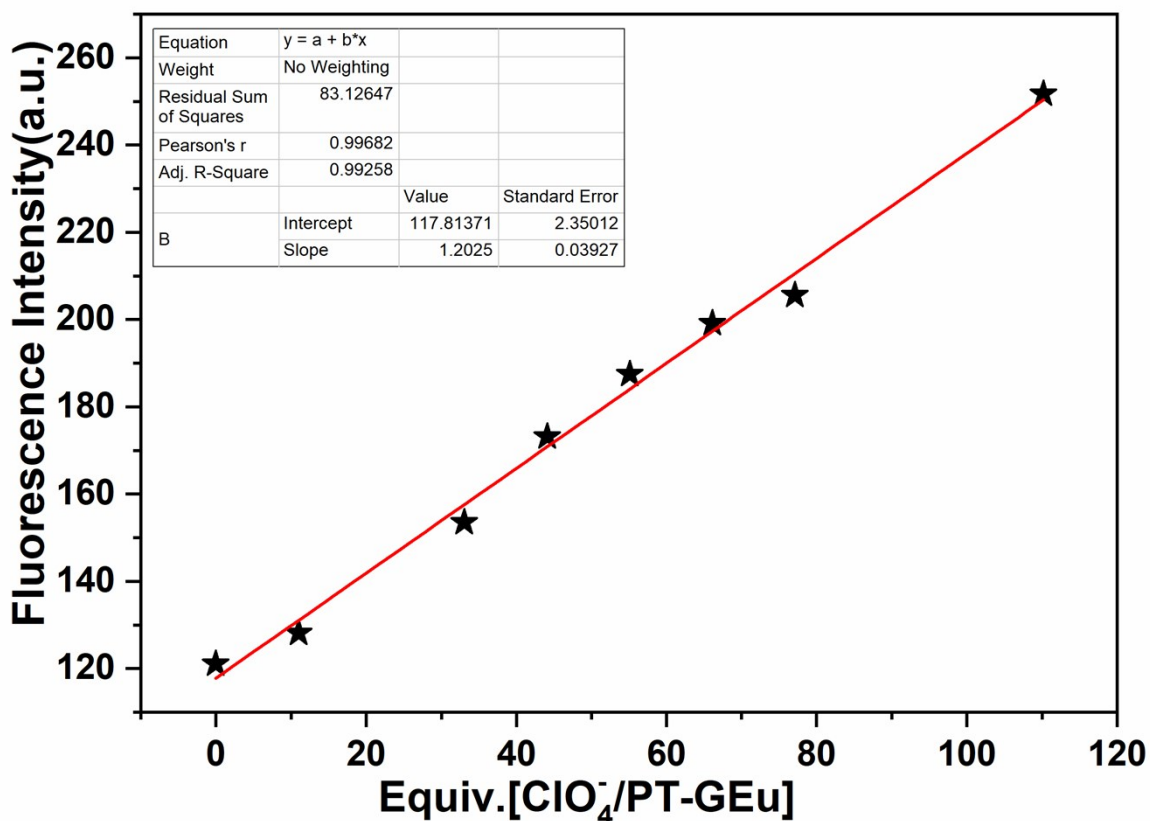

**Figure S24.** Photograph of the linear range for ClO<sub>4</sub><sup>-</sup>.

The result of the analysis as follows:

Linear Equation:  $Y = 1.20 \times X + 117.81$        $R^2 = 0.99$

$S = 1.20 \times 10^6$

$$\delta = \sqrt{\frac{\sum_{i=1}^N (F_i - \bar{F})^2}{N - 1}} = 1.35 \quad (N=20)$$

$LOD = K \times \delta/S = 3.36 \times 10^{-6} \text{ M} \quad (K=3).$

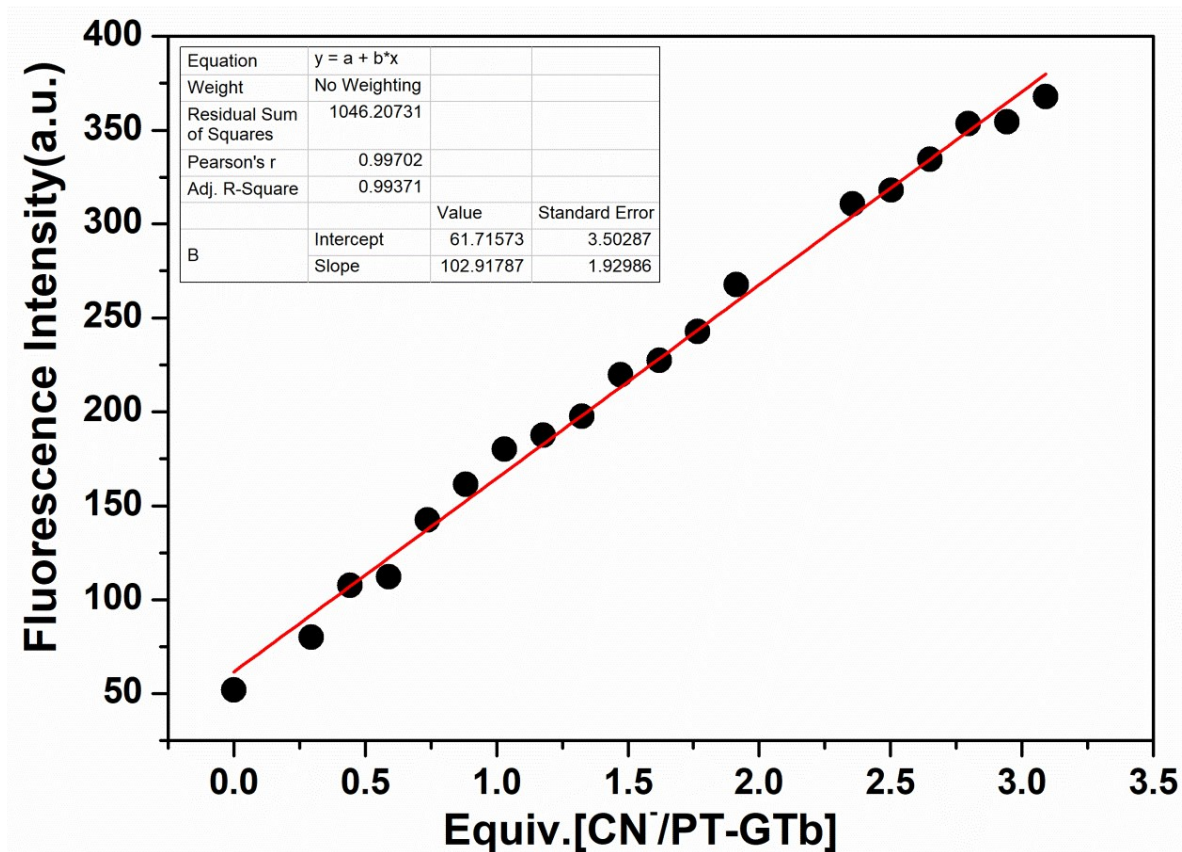

Figure S25. Photograph of the linear range for CN<sup>-</sup>.

The result of the analysis as follows:

Linear Equation:  $Y=102.92 \times X + 61.72$        $R^2=0.99$

$S=1.03 \times 10^8$

$$\delta = \sqrt{\frac{\sum_{i=1}^N (F_i - \bar{F})^2}{N - 1}} = 2.05 \text{ (N=20)}$$

$LOD = K \times \delta/S = 5.96 \times 10^{-8} \text{ M (K=3)}$

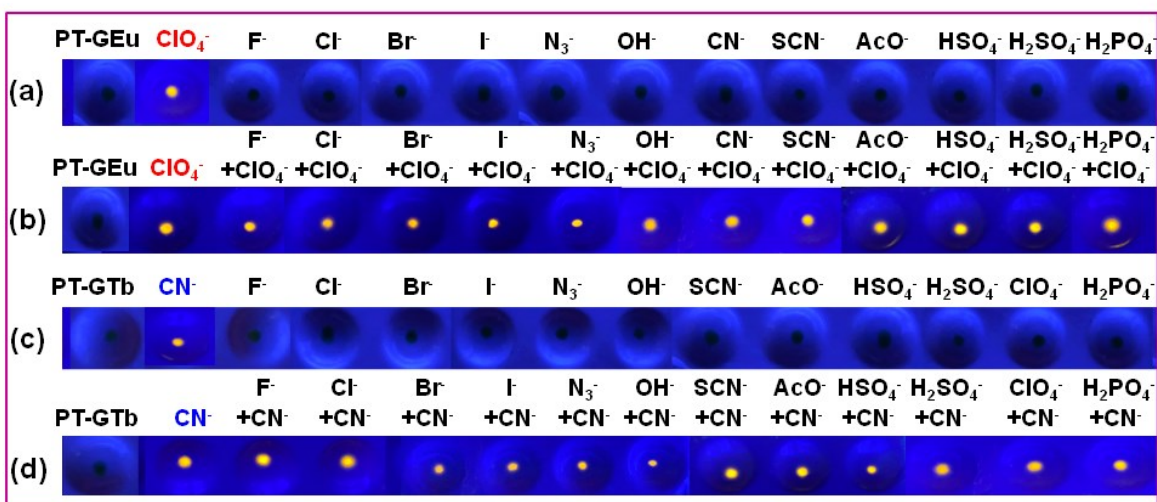

**Figure S26.** The control experiments: (a) **PT-GEu** and **PT-GEu** treated by water solutions of various anions ( $\text{F}^-$ ,  $\text{Cl}^-$ ,  $\text{Br}^-$ ,  $\text{I}^-$ ,  $\text{N}_3^-$ ,  $\text{OH}^-$ ,  $\text{CN}^-$ ,  $\text{SCN}^-$ ,  $\text{AcO}^-$ ,  $\text{HSO}_4^-$ ,  $\text{H}_2\text{SO}_4^-$ ,  $\text{ClO}_4^-$  and  $\text{H}_2\text{PO}_4^-$ ); (b) **PT-GEu** and **PT-GEu** contained water solutions of various anions ( $\text{F}^-$ ,  $\text{Cl}^-$ ,  $\text{Br}^-$ ,  $\text{I}^-$ ,  $\text{N}_3^-$ ,  $\text{OH}^-$ ,  $\text{CN}^-$ ,  $\text{SCN}^-$ ,  $\text{AcO}^-$ ,  $\text{HSO}_4^-$ ,  $\text{H}_2\text{SO}_4^-$  and  $\text{H}_2\text{PO}_4^-$ ) treated by water solution of  $\text{ClO}_4^-$ . (c) **PT-GTb** and **PT-GTb** treated by water solutions of various anions ( $\text{F}^-$ ,  $\text{Cl}^-$ ,  $\text{Br}^-$ ,  $\text{I}^-$ ,  $\text{N}_3^-$ ,  $\text{OH}^-$ ,  $\text{CN}^-$ ,  $\text{SCN}^-$ ,  $\text{AcO}^-$ ,  $\text{HSO}_4^-$ ,  $\text{H}_2\text{SO}_4^-$ ,  $\text{ClO}_4^-$  and  $\text{H}_2\text{PO}_4^-$ ); (d) **PT-GTb** and **PT-GTb** contained water solutions of various anions ( $\text{F}^-$ ,  $\text{Cl}^-$ ,  $\text{Br}^-$ ,  $\text{I}^-$ ,  $\text{N}_3^-$ ,  $\text{OH}^-$ ,  $\text{SCN}^-$ ,  $\text{AcO}^-$ ,  $\text{HSO}_4^-$ ,  $\text{H}_2\text{SO}_4^-$ ,  $\text{ClO}_4^-$  and  $\text{H}_2\text{PO}_4^-$ ) treated by water solution of  $\text{CN}^-$ .

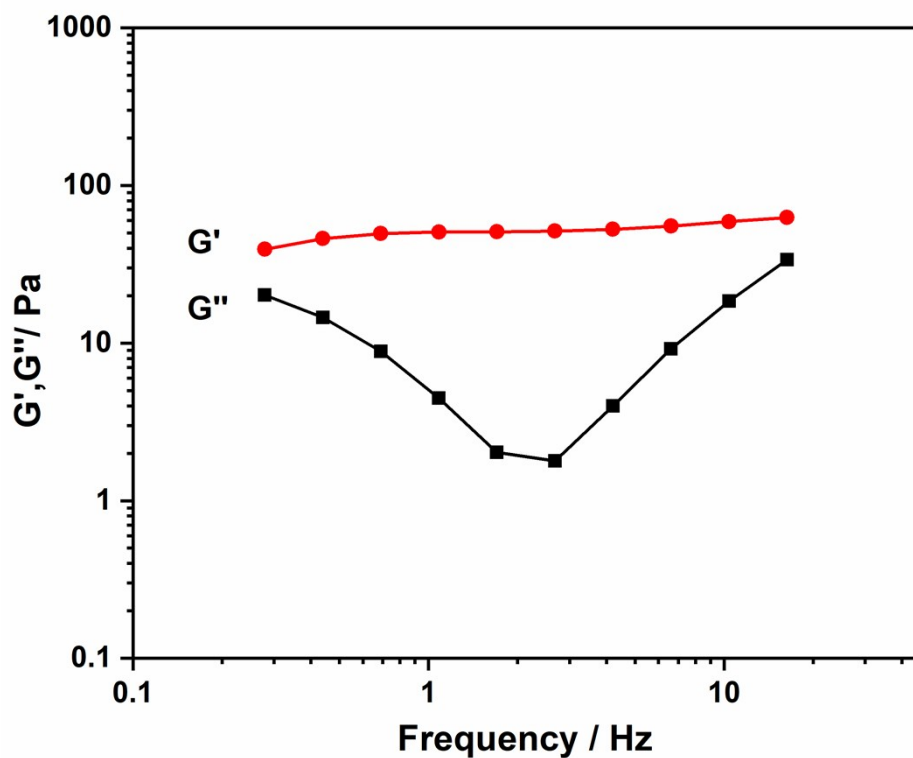

**Figure S27.** Frequency-dependent elastic (or storage) modulus  $G'$  and viscous (or loss) modulus  $G''$  of the supramolecular hydrogel for PT-G.

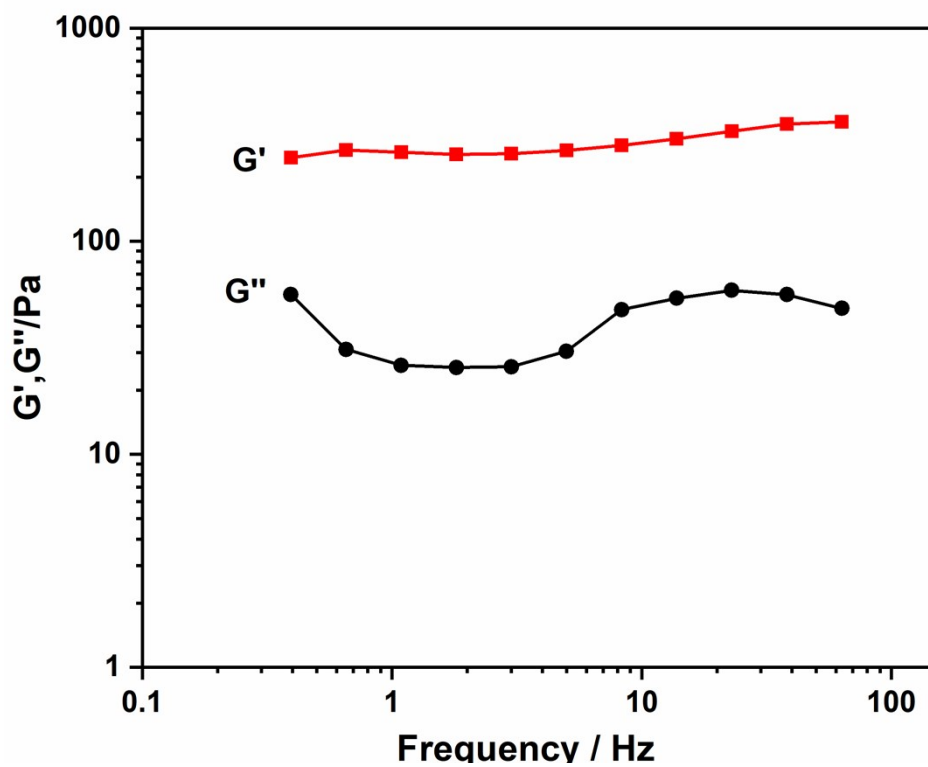

**Figure S28.** Frequency-dependent elastic (or storage) modulus  $G'$  and viscous (or loss) modulus  $G''$  of the supramolecular hydrogel for PT-GEu.

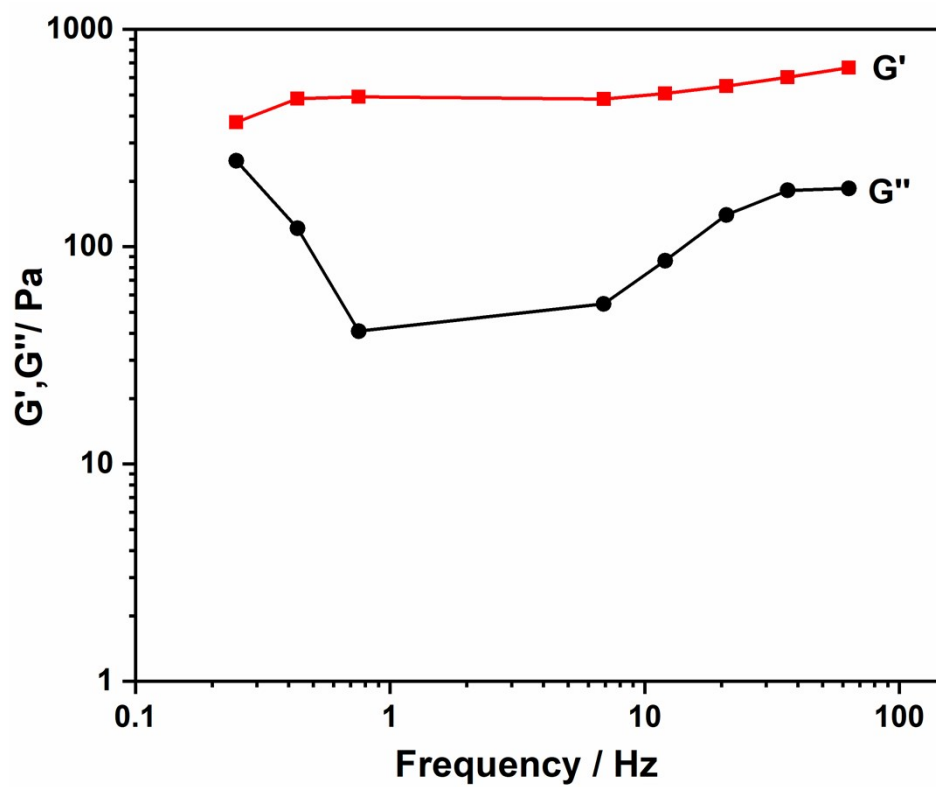

**Figure S29.** Frequency-dependent elastic (or storage) modulus  $G'$  and viscous (or loss) modulus  $G''$  of the supramolecular hydrogel for PT-GTb.



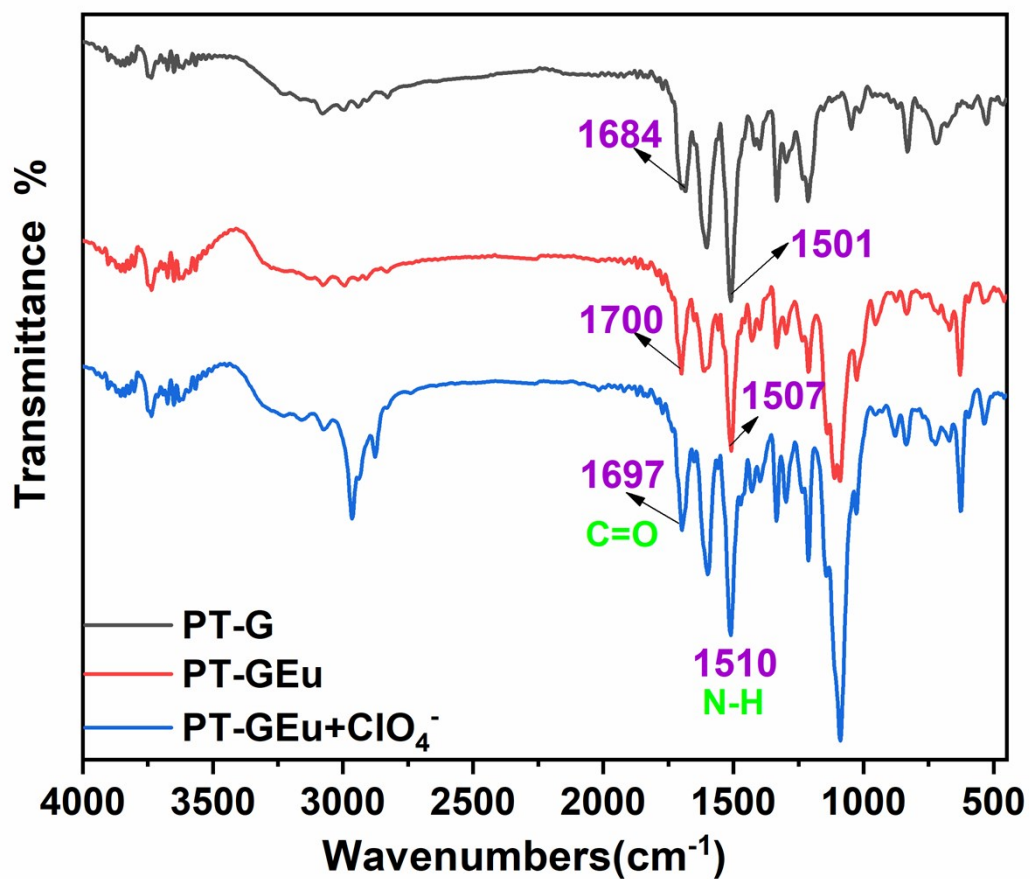

Figure S30. FT-IR spectra of the PT-G, PT-GEu and PT-GEu+ClO<sub>4</sub><sup>-</sup>.

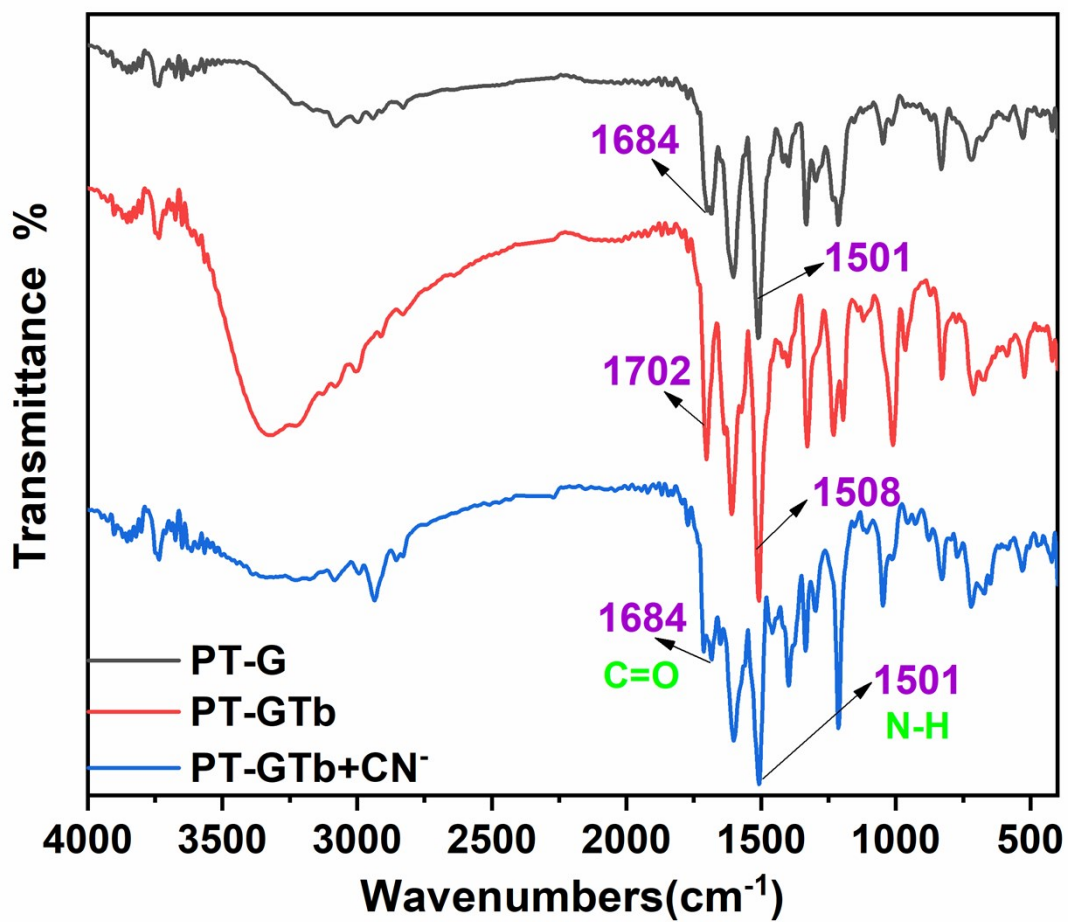

Figure S31. FT-IR spectra of the PT-G, PT-GTb and PT-GTb+CN<sup>-</sup>.

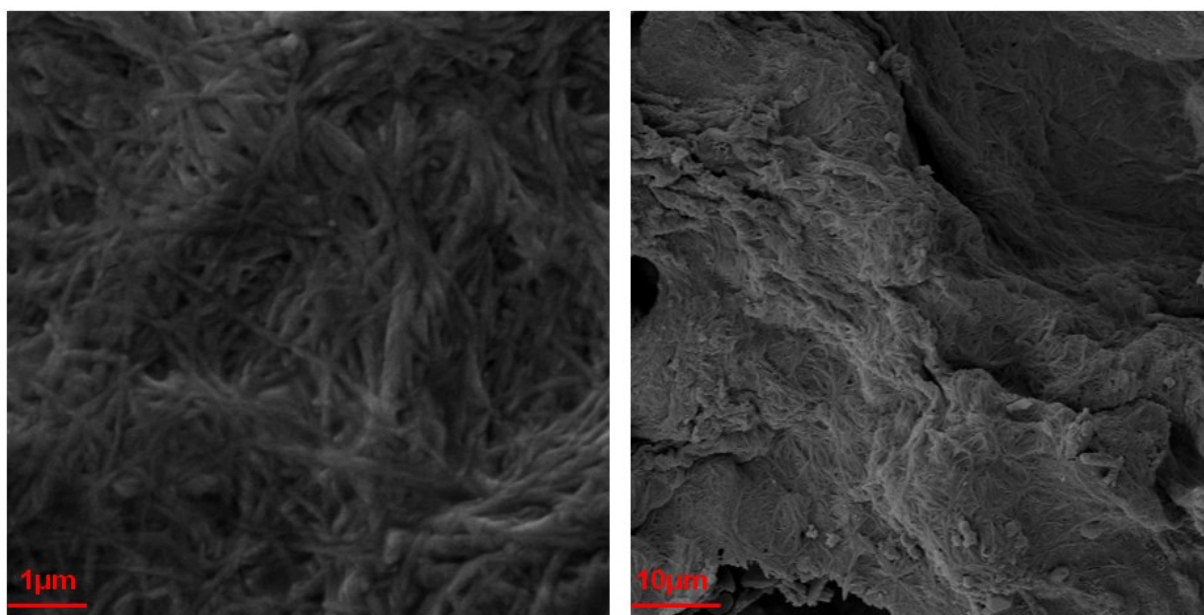

Figure S32. SEM images of (f) xerogel PT-GTb, (g) xerogel PT-GTb+CN<sup>-</sup>.

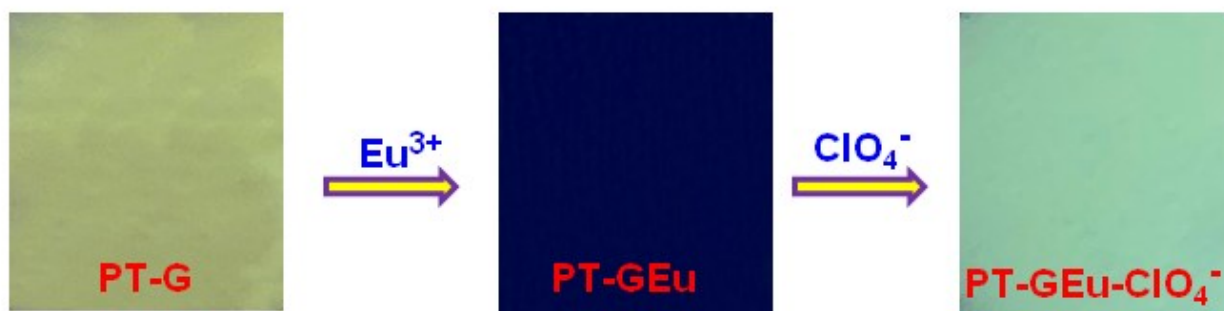

**Figure S33.** Fluorescence colors changes (under the UV lamp, at  $\lambda_{\text{ex}} = 365 \text{ nm}$ ) of the **PT-G** and **PT-GEu**-based test kits after addition of different concentration  $\text{Eu}^{3+}$  and  $\text{ClO}_4^-$  (from 0 M to 0.1 M).

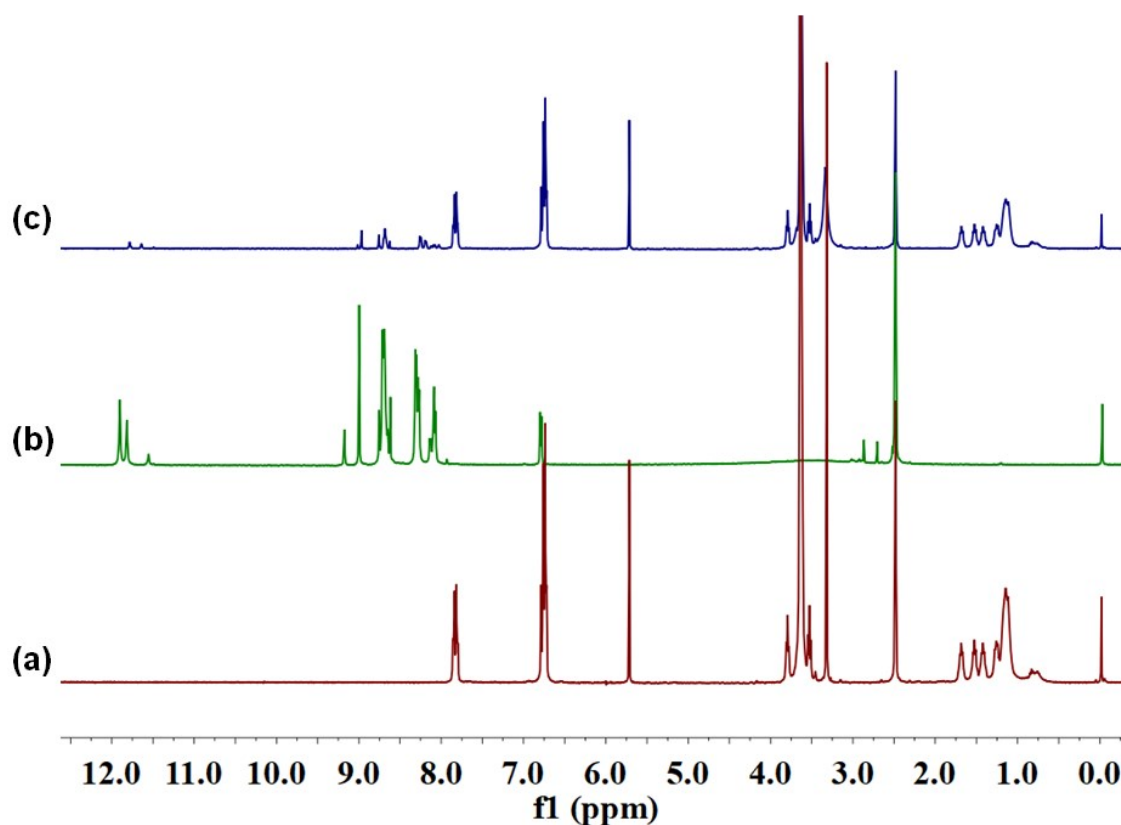

**Figure S34.** Complete host-guest <sup>1</sup>H NMR spectra of (a) free **PM**, (b) free **TH**, (c) **PM**⊂**TH** 3.0 equiv. in ( $\text{DMSO-}d_6$ ).

### 3. Supplementary table

**Table S1.** Gelation Properties of PT-G in Different Organic Solvents.

| Entry | Solvent                              | State <sup>a</sup> | CGC <sup>b</sup> (%) | Tgel <sup>c</sup> ( °C,wt%) |
|-------|--------------------------------------|--------------------|----------------------|-----------------------------|
| 1     | water                                | P                  | \                    | \                           |
| 2     | acetone                              | p                  | \                    | \                           |
| 3     | methanol                             | P                  | \                    | \                           |
| 4     | ethanol                              | p                  | \                    | \                           |
| 5     | isopropanol                          | p                  | \                    | \                           |
| 6     | isopentanol                          | p                  | \                    | \                           |
| 7     | acetonitrile                         | P                  | \                    | \                           |
| 8     | THF                                  | S                  | \                    | \                           |
| 9     | DMF                                  | S                  | \                    | \                           |
| 10    | DMF + H <sub>2</sub> O               | P                  | \                    | \                           |
| 11    | DMSO                                 | S                  | \                    | \                           |
| 12    | DMSO + H <sub>2</sub> O              | G                  | 3.33%                | 57 °C                       |
| 13    | CCl <sub>4</sub>                     | P                  | \                    | \                           |
| 14    | n-hexane                             | p                  | \                    | \                           |
| 15    | ethanediol                           | P                  | \                    | \                           |
| 16    | tert-butylalcohol                    | P                  | \                    | \                           |
| 17    | CH <sub>2</sub> Cl <sub>2</sub>      | S                  | \                    | \                           |
| 18    | CHCl <sub>3</sub>                    | S                  | \                    | \                           |
| 19    | CH <sub>2</sub> ClCH <sub>2</sub> Cl | P                  | \                    | \                           |
| 20    | petroleum ether                      | P                  | \                    | \                           |
| 21    | ethyl acetate                        | P                  | \                    | \                           |
| 22    | n-propanol                           | p                  | \                    | \                           |
| 23    | n-butyl alcohol                      | p                  | \                    | \                           |
| 24    | cyclohexanol                         | S                  | \                    | \                           |
| 25    | n-hexanol                            | p                  | \                    | \                           |
| 26    | propanetriol                         | —                  | \                    | \                           |

<sup>a</sup> G, P and S denote gelation, precipitation and solution, respectively.

<sup>b</sup> The critical gelation concentration (wt%, 10mg/ml = 1.0%).

<sup>c</sup> The gelation temperature (°C).

**Table S2.** The HPIC data of PT-GTb and PT-GEu with  $\text{ClO}_4^-$  and  $\text{CN}^-$ .

| Ion              | Initial concentration<br>(M) | Residual concentration<br>(M) | Absorbing rate<br>% |
|------------------|------------------------------|-------------------------------|---------------------|
| $\text{ClO}_4^-$ | $1 \times 10^{-4}$ M         | $6.67 \times 10^{-6}$ M       | 93.33%              |
| $\text{CN}^-$    | $1 \times 10^{-4}$ M         | $7.14 \times 10^{-6}$ M       | 92.86%              |

Calculation method of adsorption percentage:

$$\text{Adsorption percentage}(\%) = \left( 1 - \frac{C_R \times V_R}{C_I \times V_I} \right) \times 100\%$$

(State:  $C_R$  is the residual concentration of  $\text{ClO}_4^-$  and  $\text{CN}^-$ ,  $C_I$  is the initial concentration of  $\text{ClO}_4^-$  and  $\text{CN}^-$ ,  $V_R=V_I$ ).

## 4. References

- [1] You-Ming Zhang, Wei Zhu, Xiao-Juan Huang, Wen-Juan Qu, Jun-Xia He, Hu Fang, Hong Yao, Tai-Bao Wei, and Qi Lin, *ACS Sustainable Chem. Eng.*, 2018, **6**, 16597-16606.
- [2] Yan-Qing Fan, Juan Liu, Yan-Yan Chen, Xiao-Wen Guan, Jiao Wang, Hong Yao, You-Ming Zhang, Tai-Bao Wei and Qi Lin, *J. Mater. Chem. C*, 2018, **6**, 13331.
